# Supplementary material for: Urbanization and agricultural intensification destabilize animal communities differently than diversity loss
Source: PubMed Central journal article supplement (PMC7264125; doi:10.1038/s41467-020-16240-6), 2020-06-01
Supplement: 41467_2020_16240_MOESM1_ESM.pdf [file 41467_2020_16240_MOESM1_ESM.pdf]

Urbanization and agricultural intensification destabilize animal communities differently than diversity loss

Olivier et al.

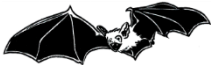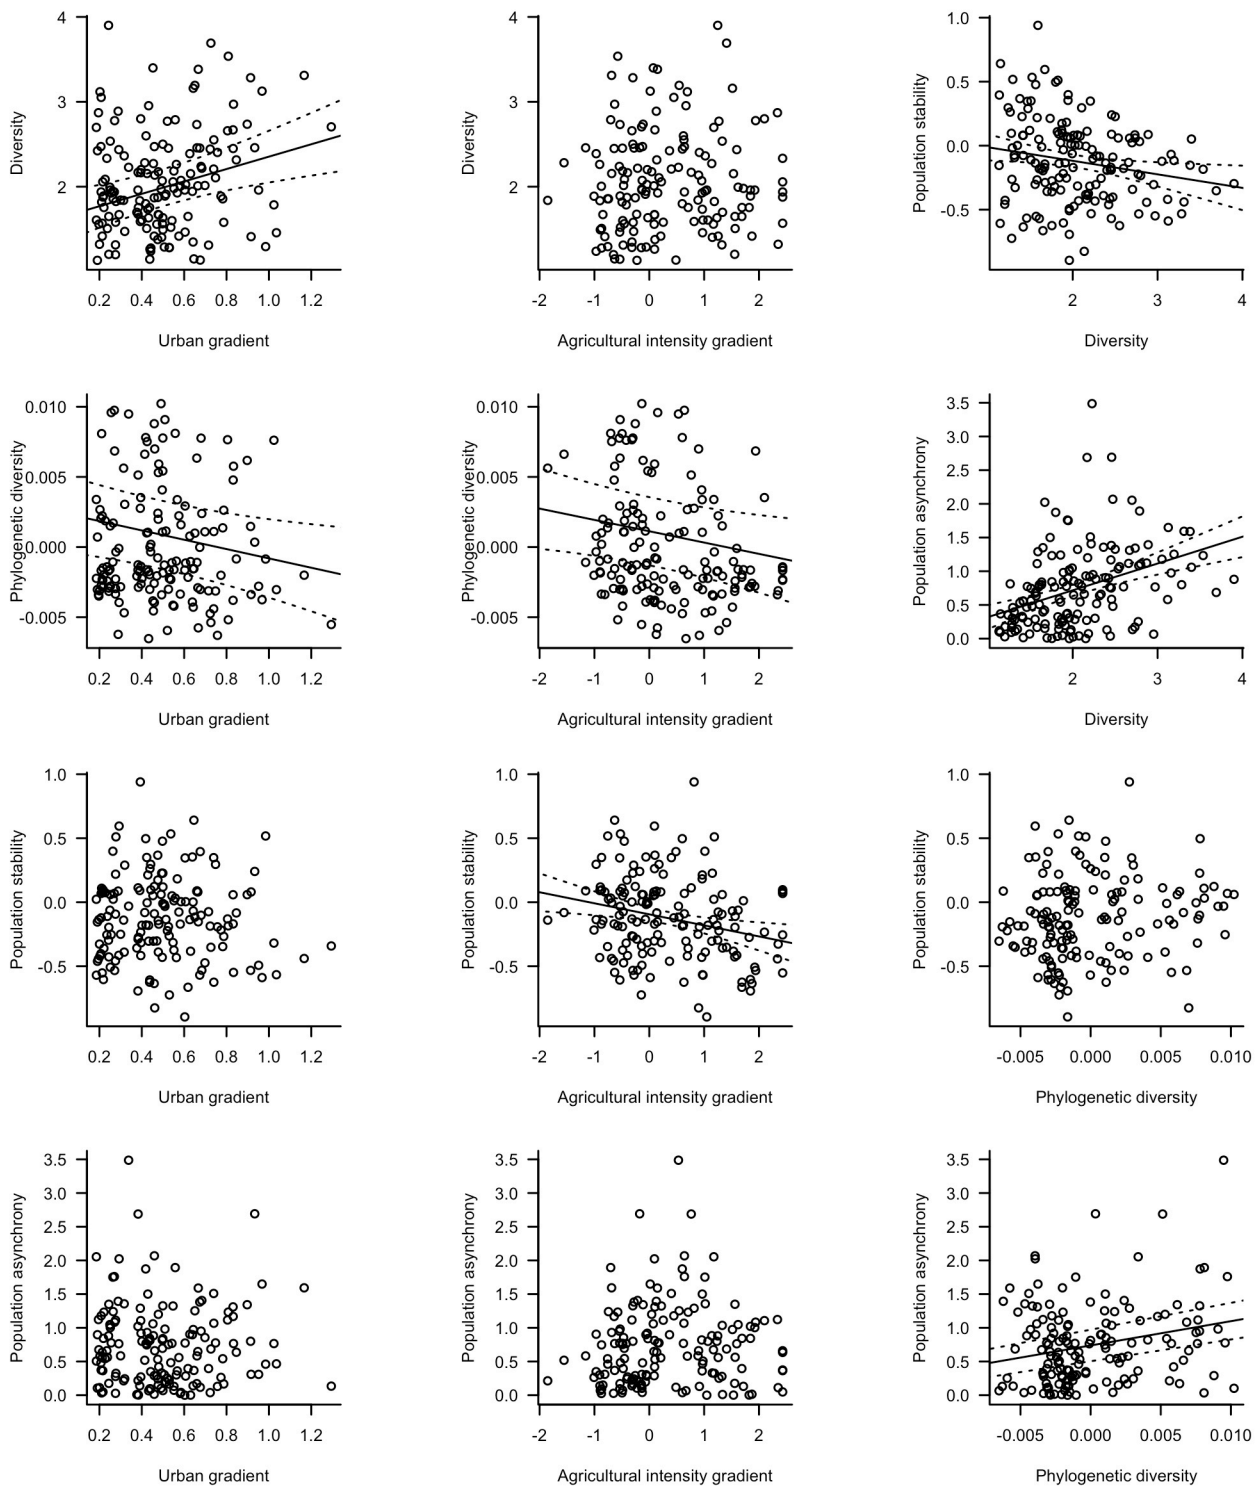

**Supplementary Fig. 1.** Relationships tested in the structural equation model used for bat communities. Significant relationships are represented by solid and dotted lines (see estimates and  $p$ -values in Supplementary Table 3). Solid lines represent linear mixed-effects model predictions for significant relationships. Dotted lines represent the CI 95% of model predictions. Population stability (measured as weighted mean population stability), asynchrony and urban gradient are log-transformed.

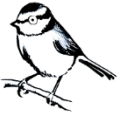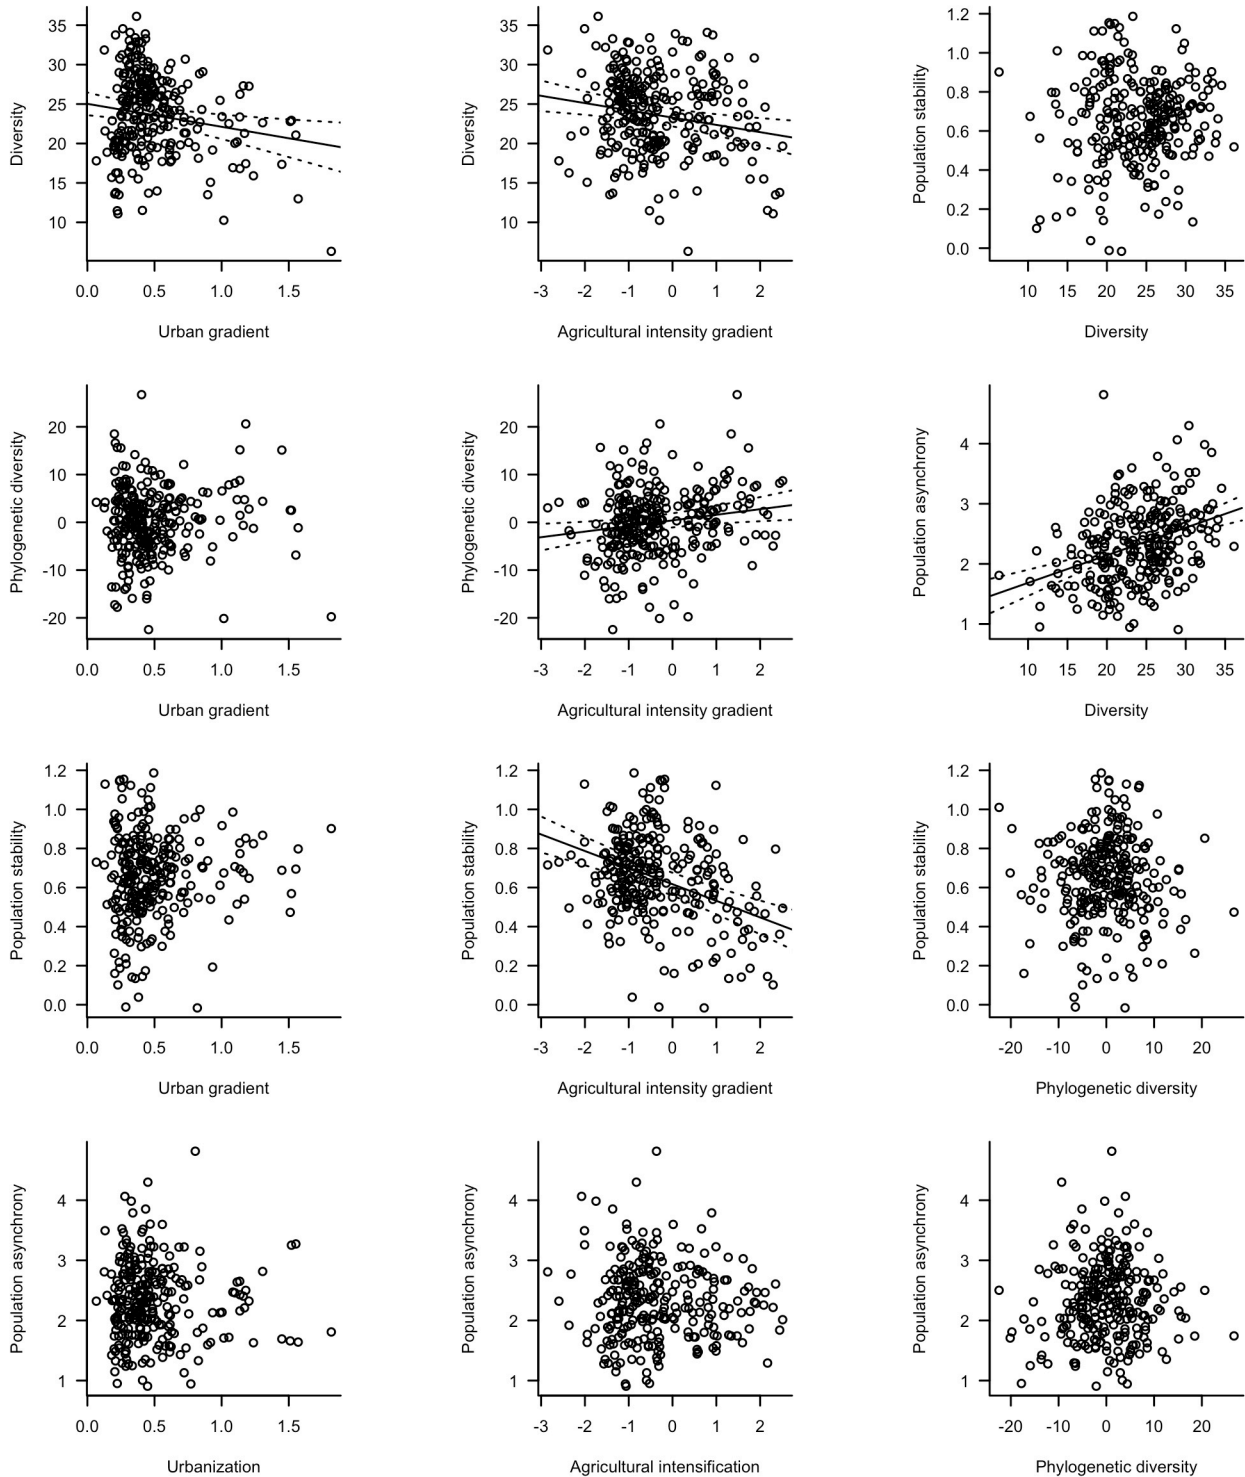

**Supplementary Fig. 2.** Relationships tested in the structural equation model used for bird communities. Significant relationships are represented by solid and dotted lines (see estimates and  $p$ -values in Supplementary Table 3). Solid lines represent linear model predictions for significant relationships. Dotted lines represent the CI 95% of model predictions. Population stability (measured as weighted mean population stability), asynchrony and urban gradient are log-transformed.

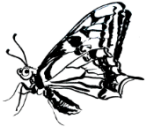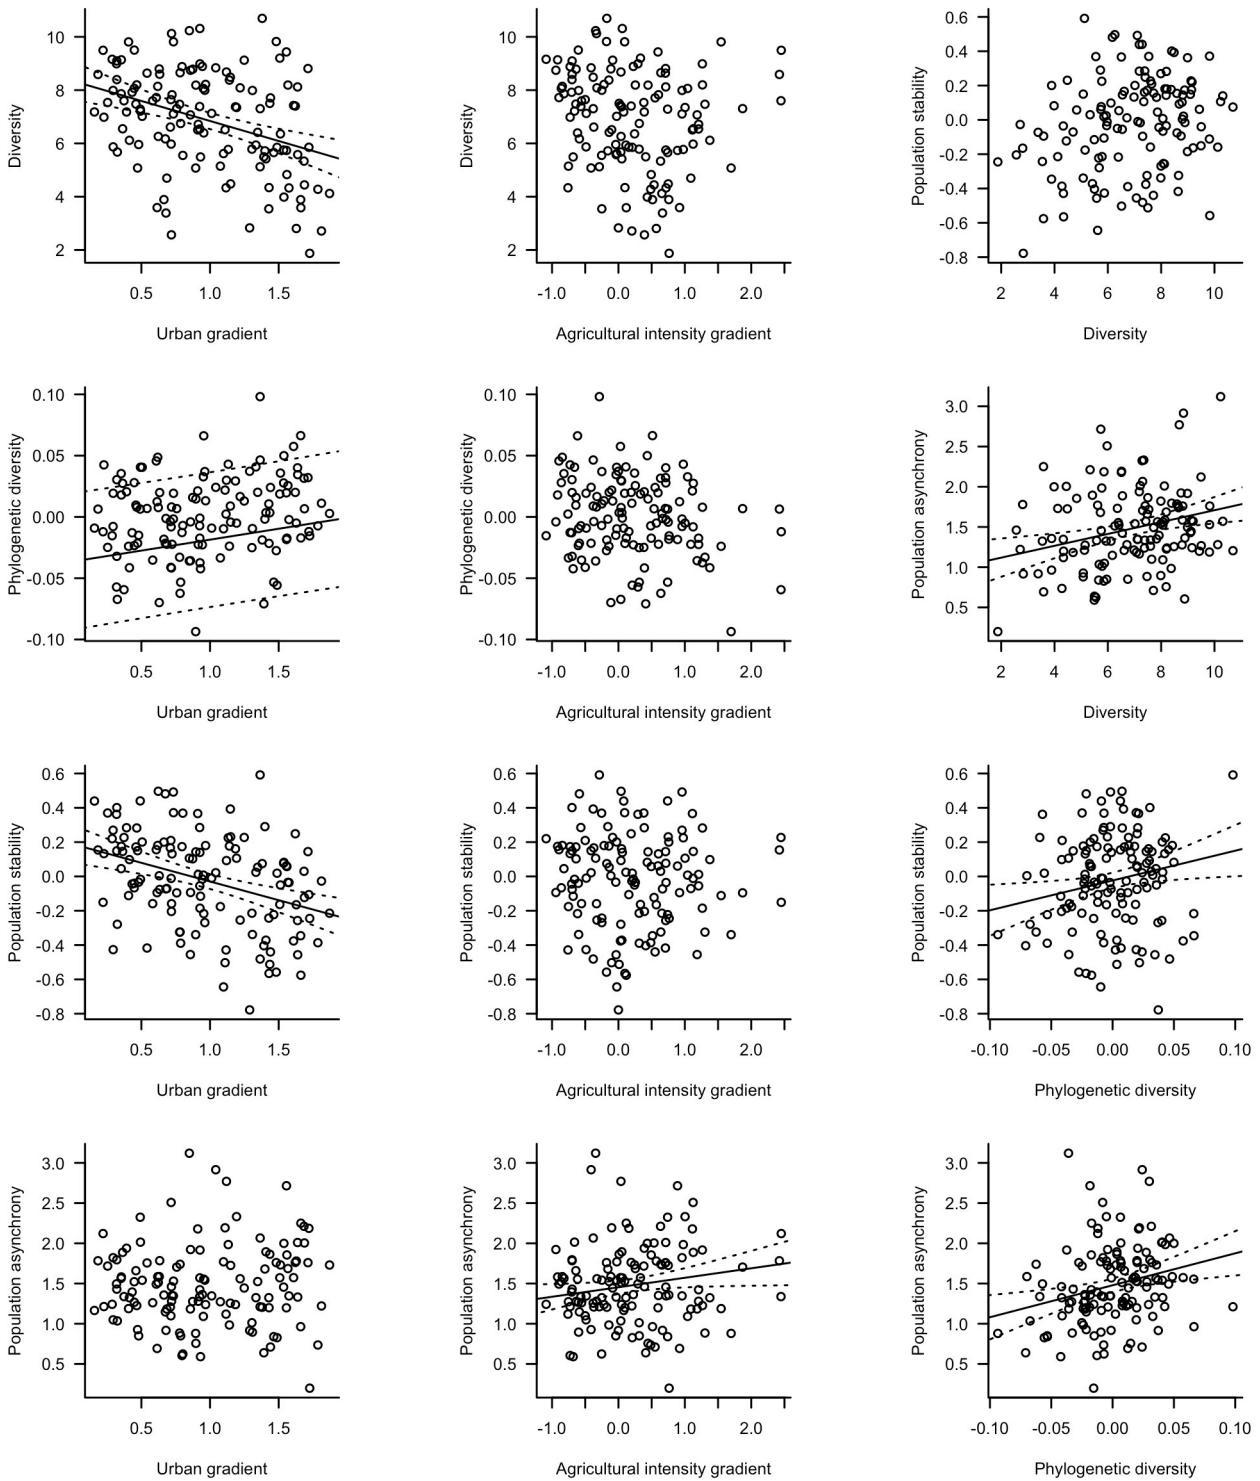

**Supplementary Fig. 3.** Relationships tested in the structural equation model used for butterfly communities. Significant relationships are represented by solid and dotted lines (see estimates and  $p$ -values in Supplementary Table 3). Solid lines represent linear model predictions for significant relationships. Dotted lines represent the CI 95% of model predictions. Population stability (measured as weighted mean population stability), asynchrony and urban gradient are log-transformed.

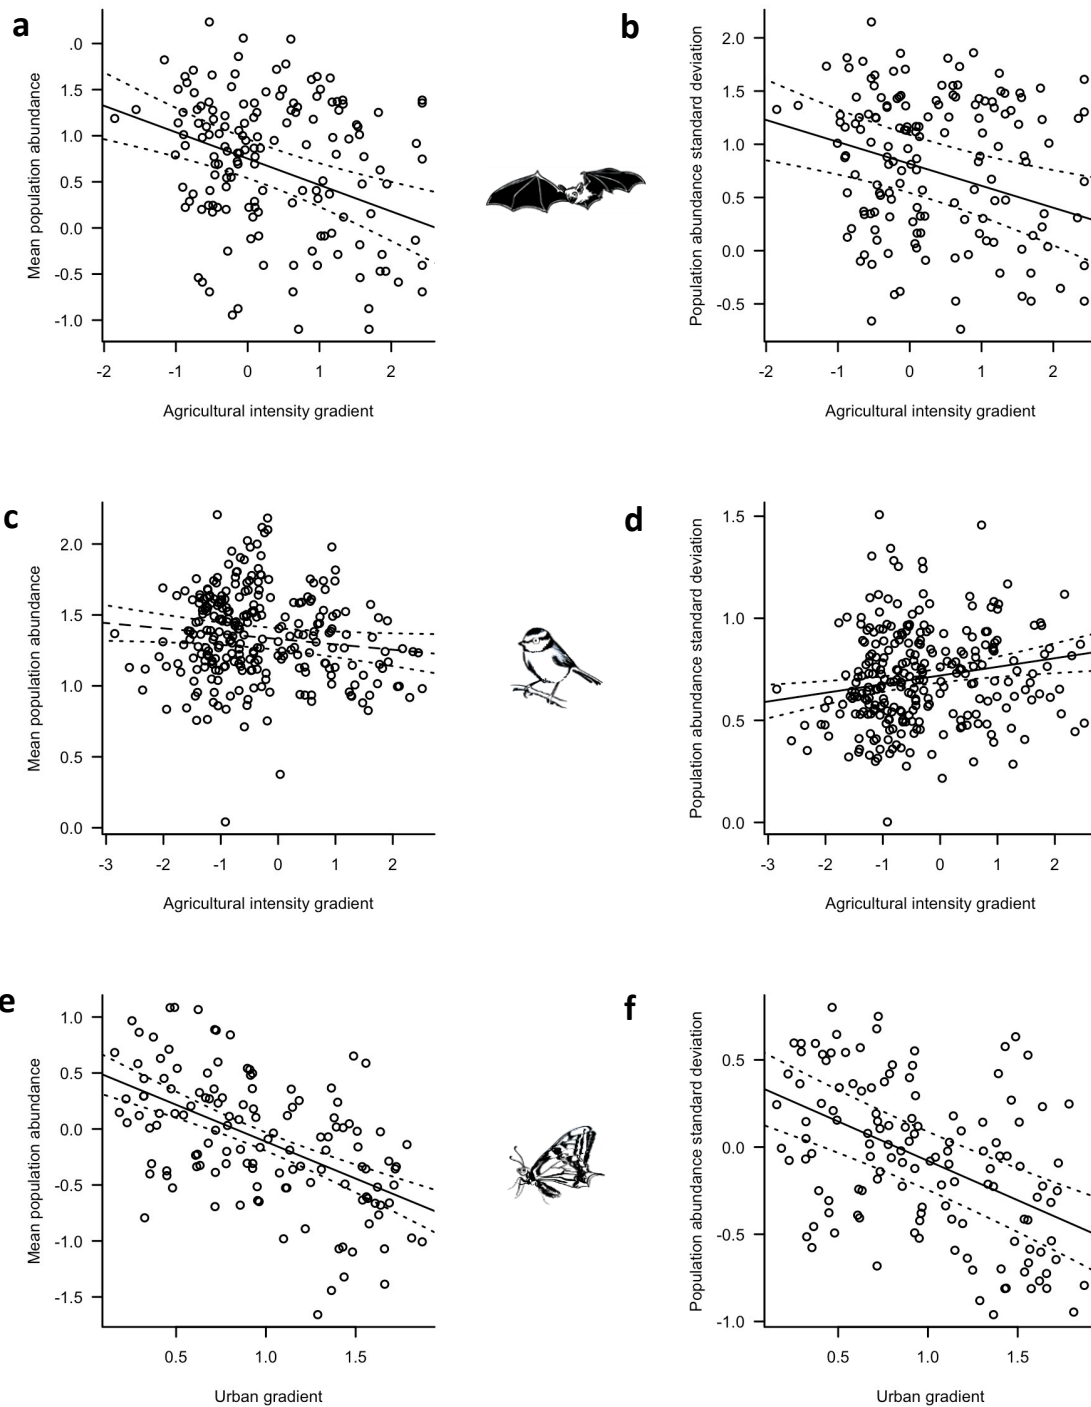

**Supplementary Fig. 4.** Relationships between habitat degradation and the community mean population abundance and the average standard deviation of population abundances for bat (a-b, estimate =  $-0.29$ ,  $p$ -value =  $10^{-4}$  and estimate =  $-0.20$ ,  $p$ -value =  $0.001$  respectively), bird (c-d, estimate =  $-0.04$ ,  $p$ -value =  $0.051$  and estimate =  $0.04$ ,  $p$ -value =  $0.003$  respectively) and butterfly (e-f, estimate =  $-0.66$ ,  $p$ -value =  $3.17 \times 10^{-11}$  and estimate =  $-0.45$ ,  $p$ -value =  $3.5 \times 10^{-9}$  respectively) communities. Solid lines represent model predictions for significant relationships, except for (c) where predictions are a dashed line because of a marginal significance. Dotted lines represent the CI 95% of model predictions. Linear mixed-effects models are used for bats, and linear models for birds and butterflies. The community mean population abundance and the average standard deviation of population abundances are log-transformed.

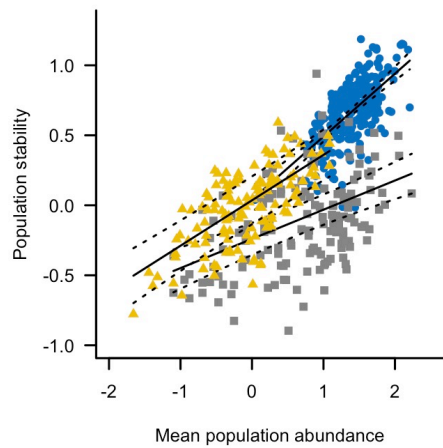

**Supplementary Fig. 5.** Relationships between population stability measured as weighted mean CV of population abundances and community mean population abundance for bird, bat and butterfly communities. Bats are grey squares, birds blue circles and butterflies yellow triangles. Black lines represent model predictions and dotted lines represent the CI 95% of model predictions (estimate = 0.45,  $p$ -value =  $4.8 \times 10^{-10}$ , estimate = 0.21,  $p$ -value =  $10^{-30}$ , estimate = 0.32,  $p$ -value =  $8 \times 10^{-20}$  for bat, bird and butterfly communities respectively). Linear mixed-effects models are used for bats, and linear models for birds and butterflies. Population stability and community mean population abundance are log-transformed.

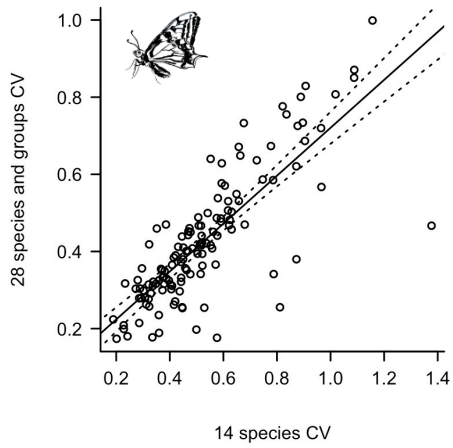

**Supplementary Fig. 6.** Relationship between the coefficients of variation of the total abundance of the butterfly communities including all species and species groups and the butterfly communities restricted to the 14 species that could be identified with certainty (estimate = 0.62,  $p$ -value =  $2 \times 10^{-16}$ ). Black line represents linear model predictions and dotted lines represent the CI 95% of model predictions.

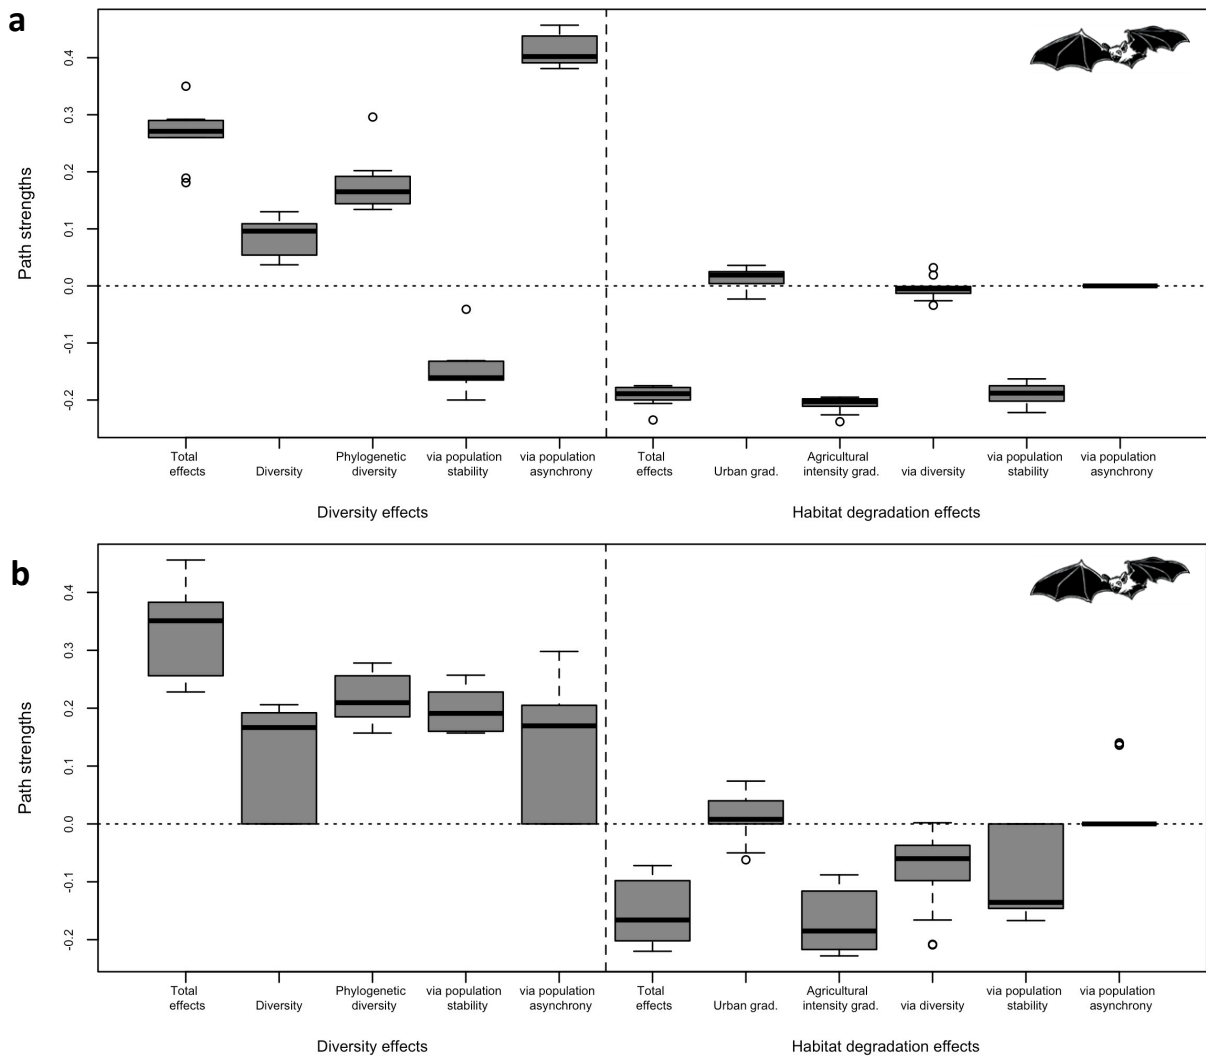

**Supplementary Fig. 7.** Boxplots of the strength of the different paths by which diversity and habitat degradation affect the stability of local communities of bats for the three buffer sizes (250, 500 and 1000m) and the three data selections (Datasets 1, 2 and 3). **a.** Distributions of path strengths from  $n=9$  SEM models using the Shannon diversity index and residual weighted MPD as diversity and phylogenetic diversity measures. **b.** Distributions of path strengths from  $n=18$  SEM models using species richness and residual non-weighted MPD (9 models) as well as species richness estimated by the Chao index and residual non-weighted MPD (9 models). As in Table 1, the strength of each path is calculated from the standardized coefficients of the structural equation models, multiplying coefficients along a path and summing the results over the different paths. Total effects refer to the sum of the effects by which diversity and phylogenetic diversity, or urbanization and agricultural intensification, affect community stability. Effects via a variable are the sum of the effects of diversity or habitat degradation on community stability that are channelled by a direct effect on this variable. Null values stand for non-significant effects. For each boxplot: center line, median; box limits, upper and lower quartiles; whiskers, 1.5x interquartile range; points, outliers.



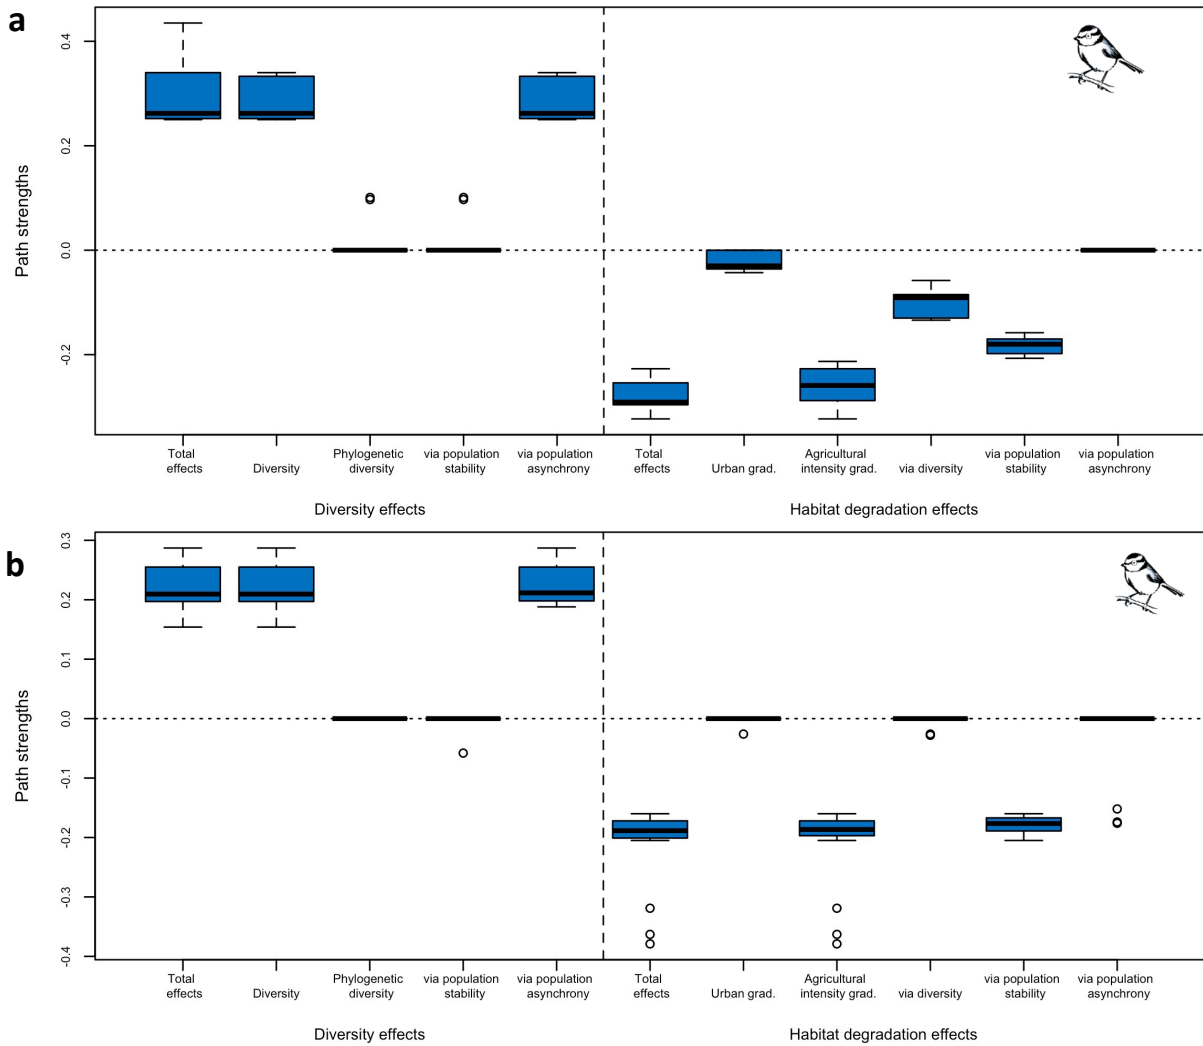

**Supplementary Fig. 8.** Boxplots of the strength of the different paths by which diversity and habitat degradation affect the stability of local communities of birds for the three buffer sizes (250, 500 and 1000m) and the three data selections (Datasets 1, 2 and 3). **a.** Distributions of path strengths from  $n=9$  SEM models using the Shannon diversity index and residual weighted MPD as diversity and phylogenetic diversity measures. **b.** Distributions of path strengths from  $n=18$  SEM models using species richness and residual non-weighted MPD (9 models) as well as species richness estimated by the Chao index and residual non-weighted MPD (9 models). As in Table 1, the strength of each path is calculated from the standardized coefficients of the structural equation models, multiplying coefficients along a path and summing the results over the different paths. Total effects refer to the sum of the effects by which diversity and phylogenetic diversity, or urbanization and agricultural intensification, affect community stability. Effects via a variable are the sum of the effects of diversity or habitat degradation on community stability that are channelled by a direct effect on this variable. Null values stand for non-significant effects. For each boxplot: center line, median; box limits, upper and lower quartiles; whiskers, 1.5x interquartile range; points, outliers.

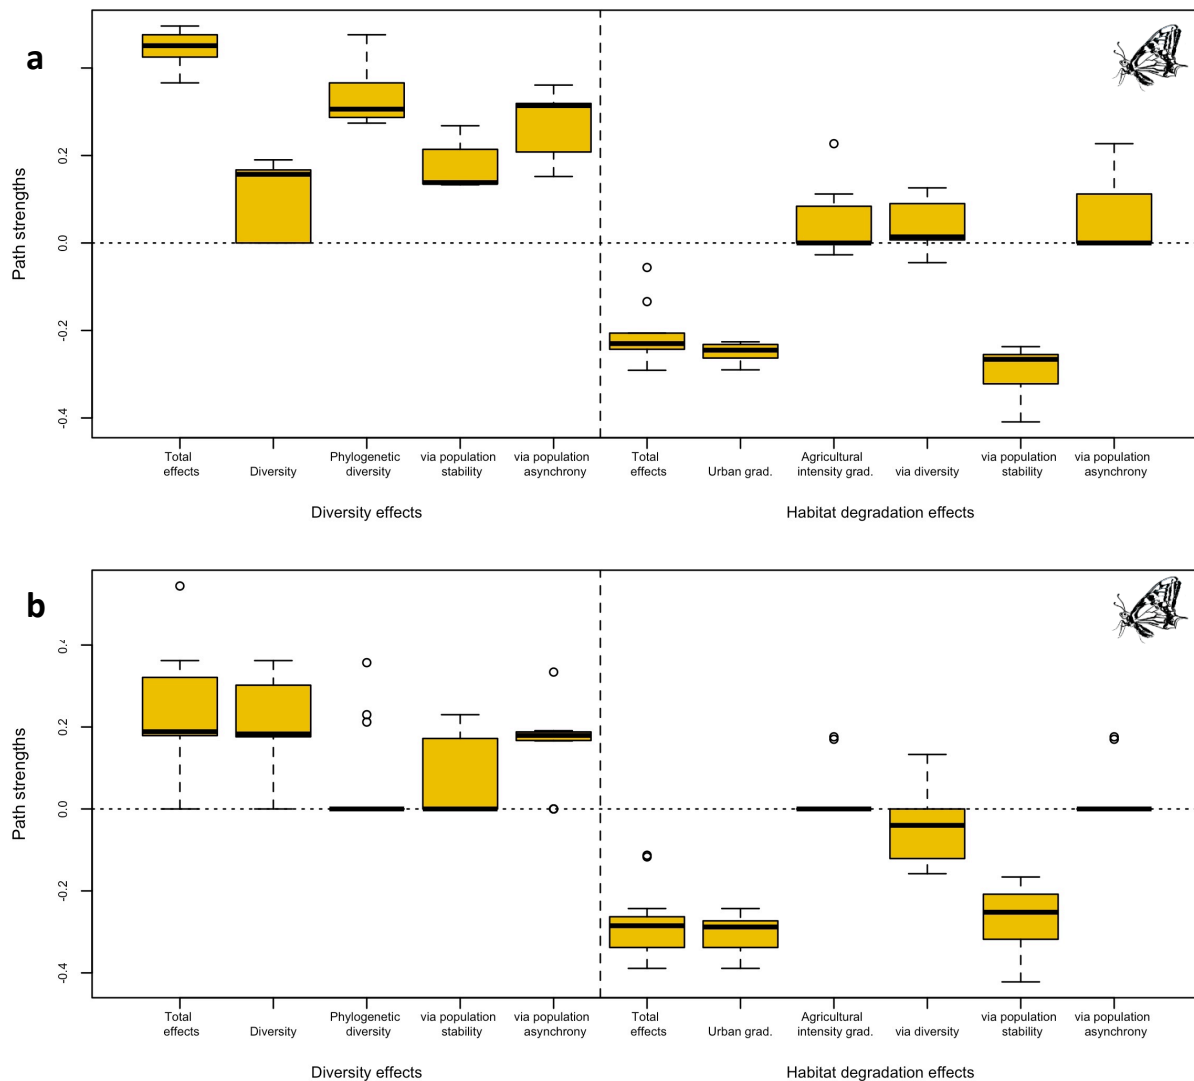

**Supplementary Fig. 9.** Boxplots of the strength of the different paths by which diversity and habitat degradation affect the stability of local communities of butterflies for the three buffer sizes (250, 500 and 1000m) and the three data selections (Datasets 1, 2 and 3). **a.** Distributions of path strengths from  $n=9$  SEM models using the Shannon diversity index and residual weighted MPD as diversity and phylogenetic diversity measures. **b.** Distributions of path strengths from  $n=18$  SEM models using species richness and residual non-weighted MPD (9 models) as well as species richness estimated by the Chao index and residual non-weighted MPD (9 models). As in Table 1, the strength of each path is calculated from the standardized coefficients of the structural equation models, multiplying coefficients along a path and summing the results over the different paths. Total effects refer to the sum of the effects by which diversity and phylogenetic diversity, or urbanization and agricultural intensification, affect community stability. Effects via a variable are the sum of the effects of diversity or habitat degradation on community stability that are channelled by a direct effect on this variable. Null values stand for non-significant effects. For each boxplot: center line, median; box limits, upper and lower quartiles; whiskers, 1.5x interquartile range; points, outliers.

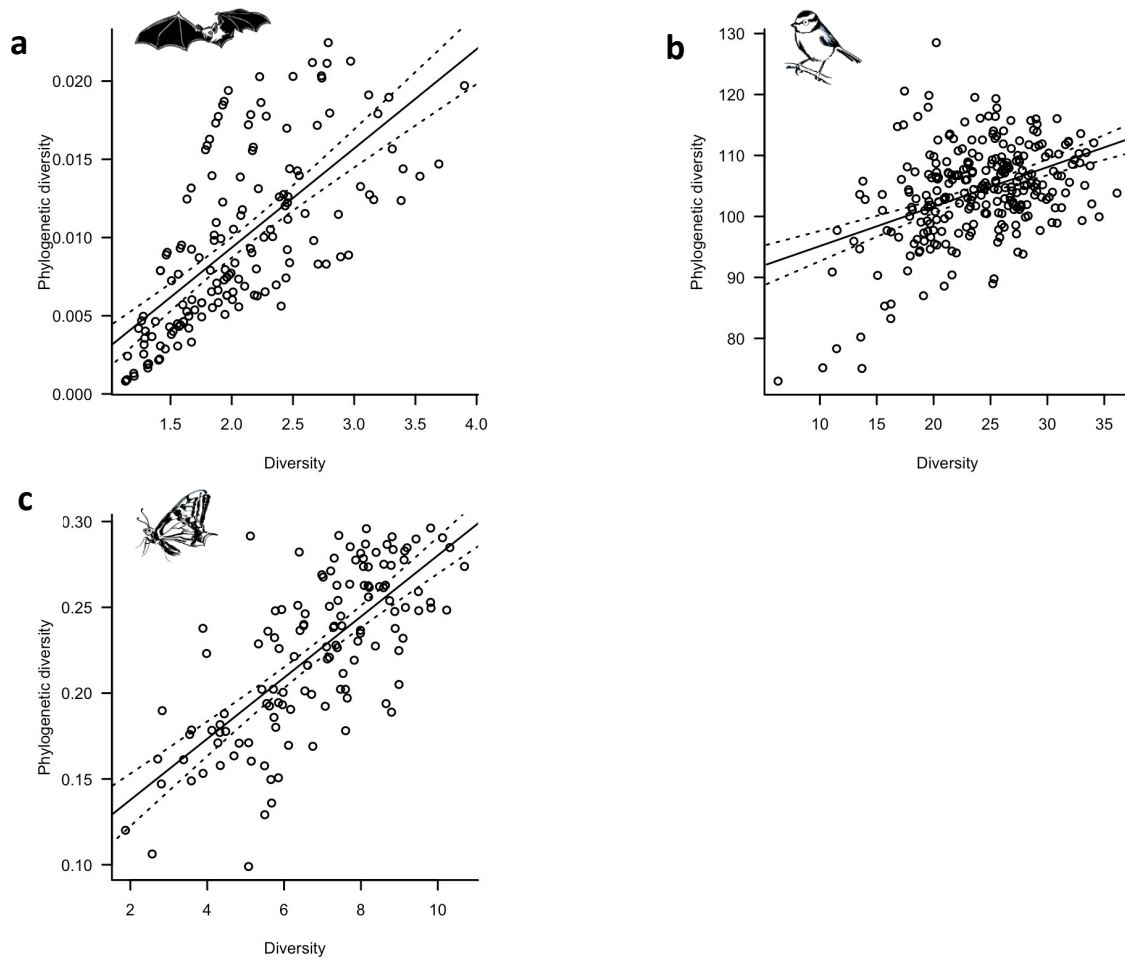

**Supplementary Fig. 10.** Relationship between species diversity and weighted phylogenetic diversity (Weighted Mean Pairwise Distance) for local communities of (a) bats (estimate = 0.01,  $p$ -value =  $2 \times 10^{-16}$ ), (b) birds (estimate = 0.64,  $p$ -value =  $5.14 \times 10^{-13}$ ) (c) and butterflies (estimate = 0.02,  $p$ -value =  $2 \times 10^{-16}$ ). Black lines represent linear model predictions for significant relationships and dotted lines represent the CI 95% of model predictions. The Weighted Mean Pairwise Distance is in million years for birds and in number of substitutions per nucleotide for bats and butterflies.

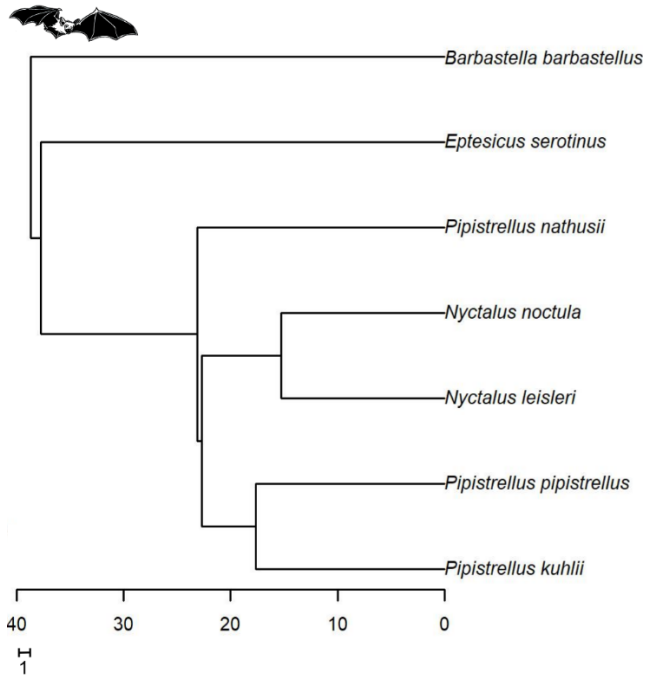

**Supplementary Fig. 11.** Phylogenetic tree of bat species present in our communities, based on Shi & Rabowski<sup>1</sup>. Branch lengths are in number of substitutions per nucleotide.

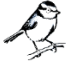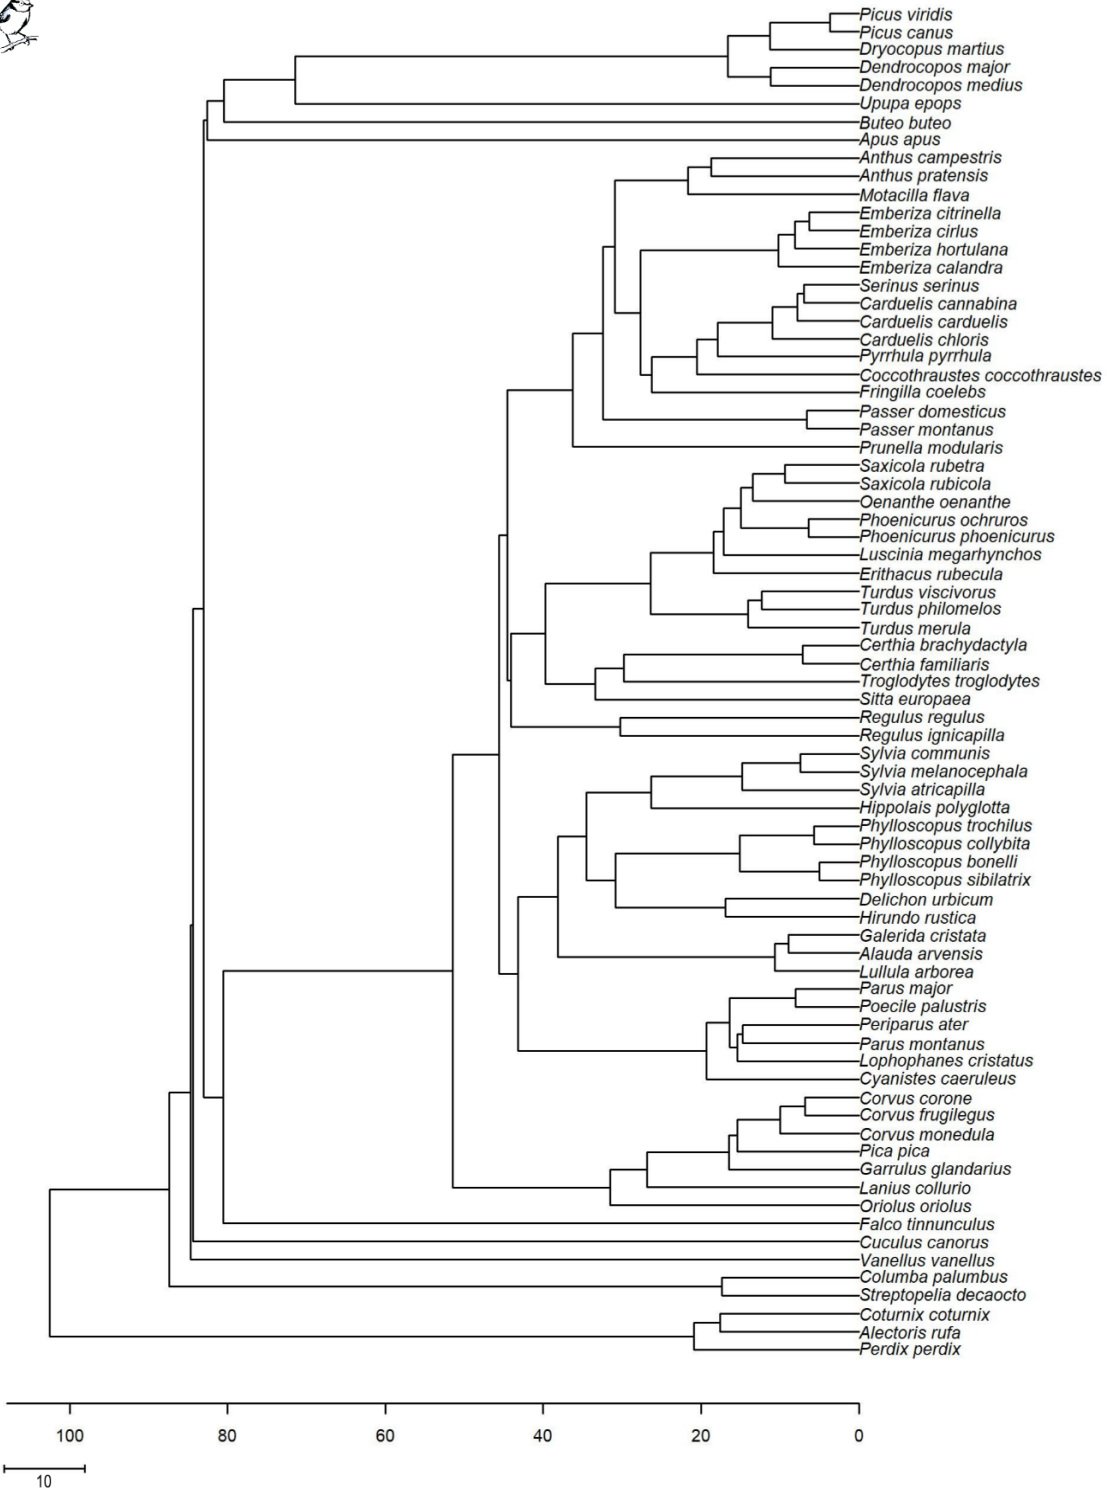

**Supplementary Fig. 12.** Phylogenetic tree of bird species present in our communities. Branch lengths are in millions of years.

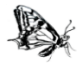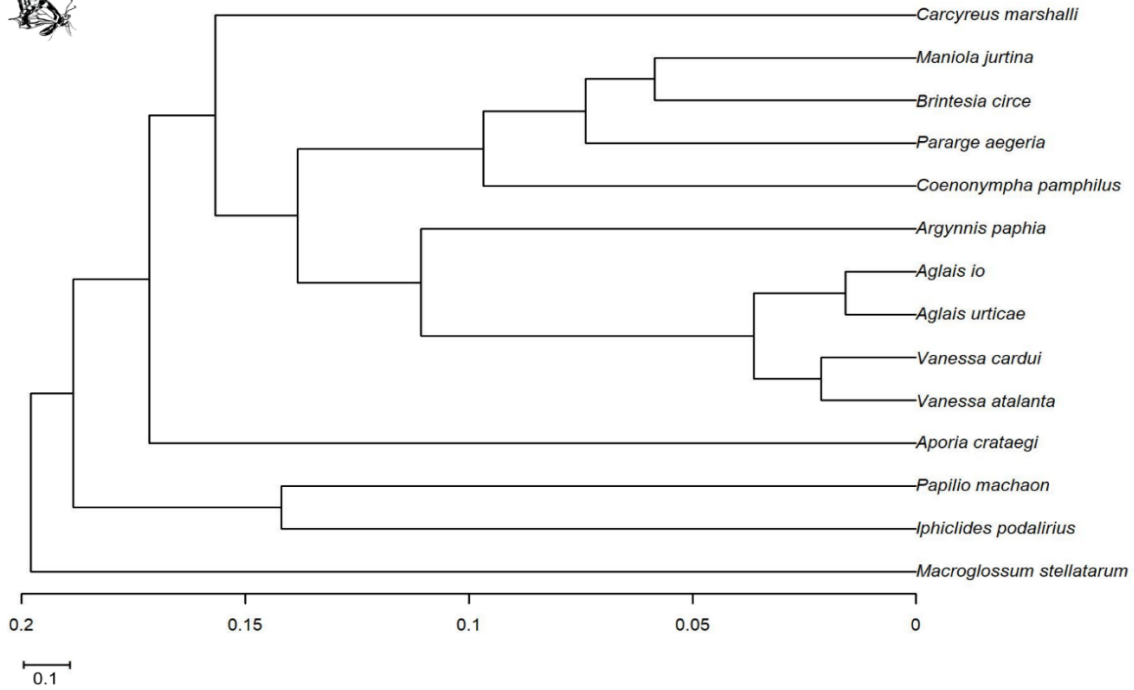

**Supplementary Fig. 13.** Phylogenetic tree of butterfly species present in our communities. Branch lengths are in number of substitutions per nucleotide.

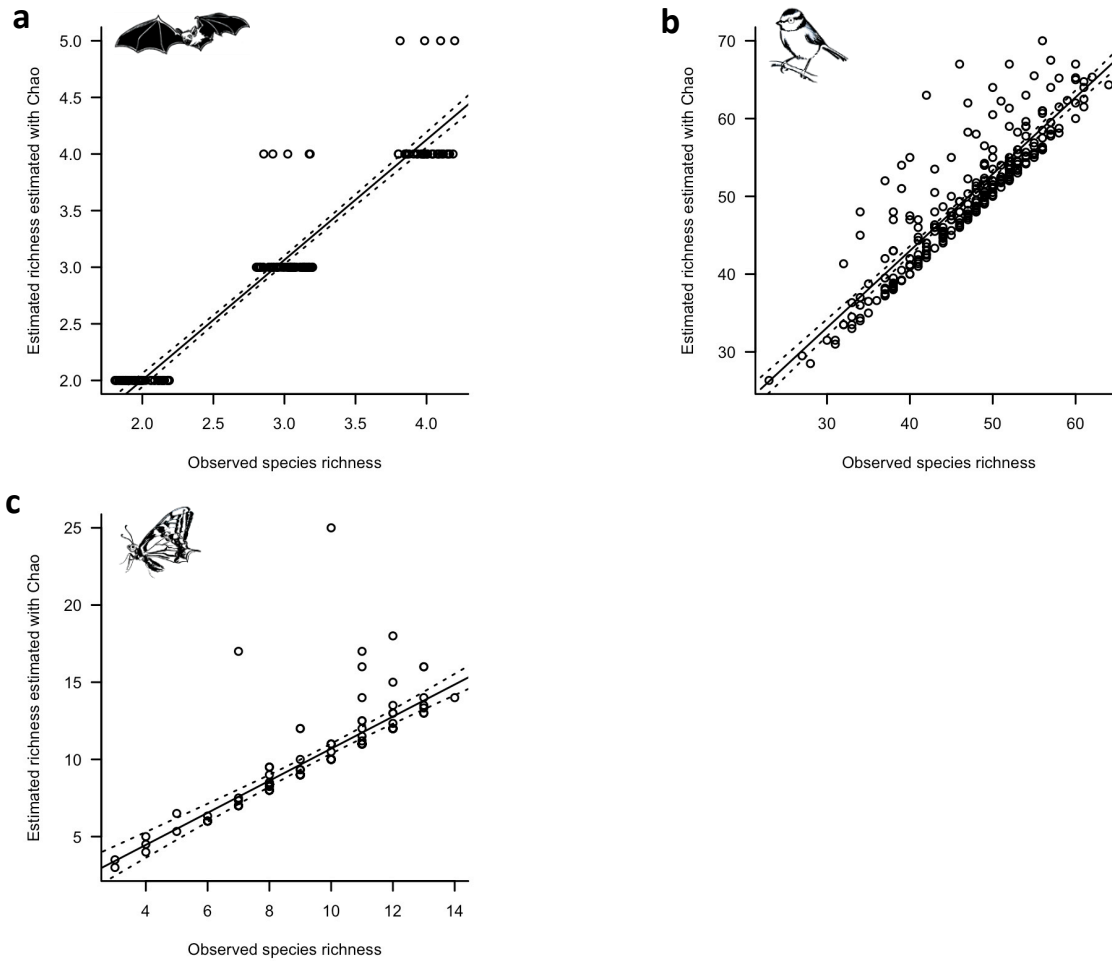

**Supplementary Fig. 14.** Relationships between species richness and Chao index for local communities of (a) bats (estimate = 1.06, p-value =  $2 \times 10^{-16}$ ), (b) birds (estimate = 0.98, p-value =  $2 \times 10^{-16}$ ) (c) and butterflies (estimate = 1.04, p-value =  $2 \times 10^{-16}$ ). Black lines represent linear model predictions for significant relationships and dotted lines represent the CI 95% of model predictions.

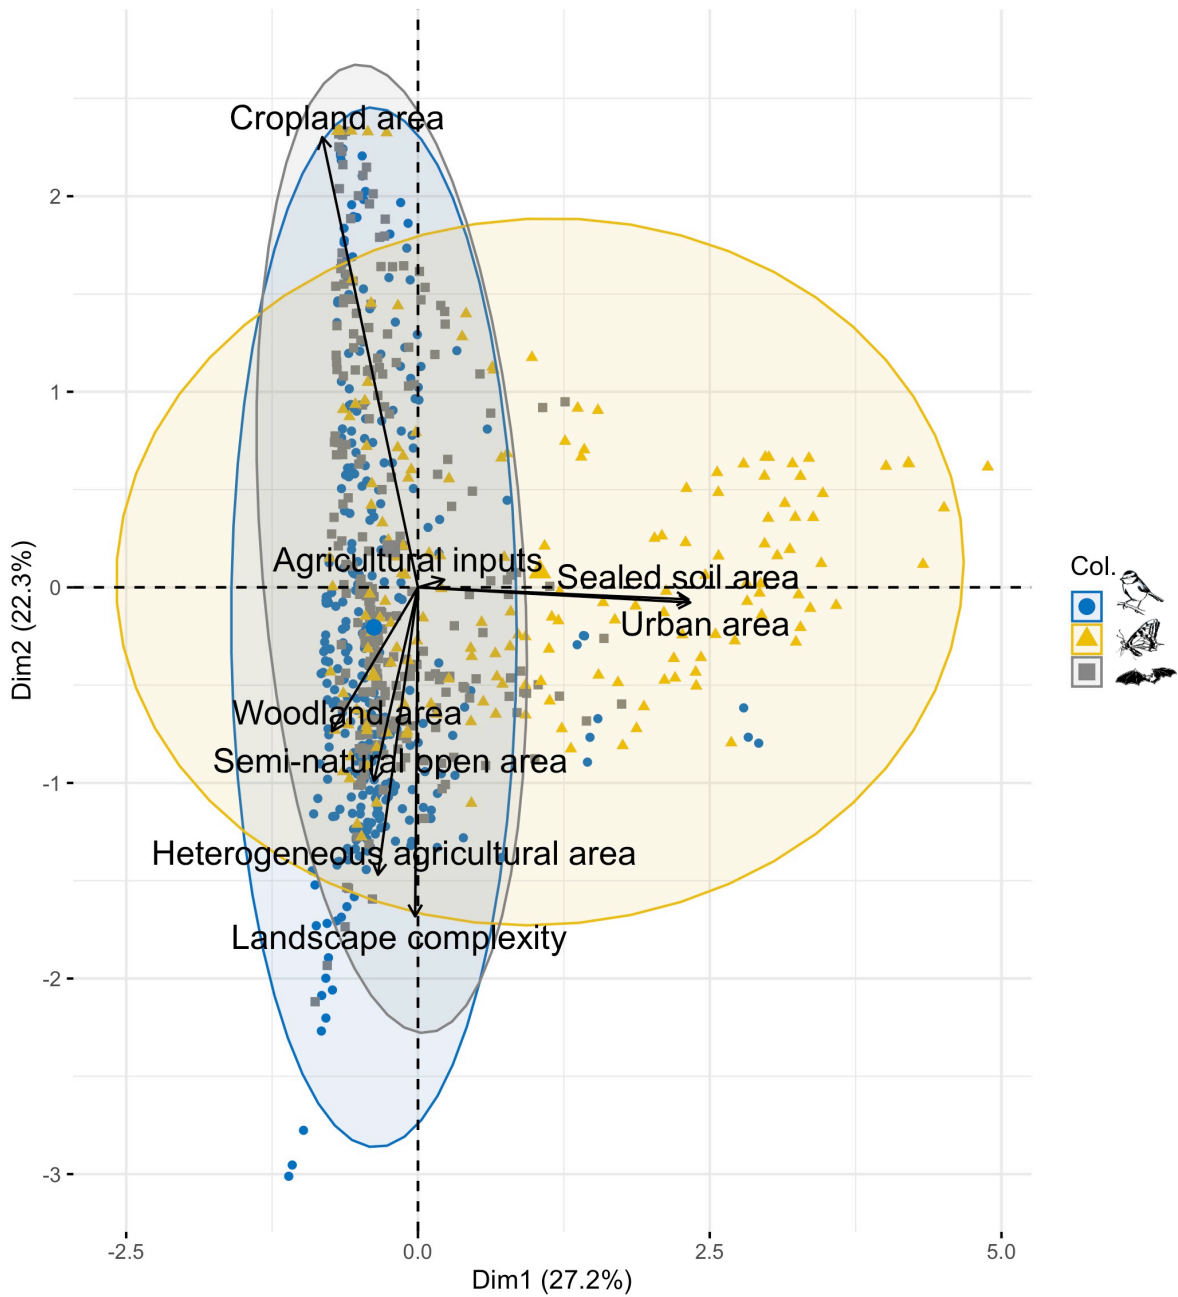

**Supplementary Fig. 15.** Graphical representation of the 2 first axis of the Principal Component Analysis for dataset with the longest time series without gap. Each point is a site and each ellipse contains 95% of the sites of the corresponding colored taxa. Each axis is a linear combination of the explanatory variables. Each arrow corresponds to the contribution of the variable to the two axes.



**Supplementary Table 1.** Species for bat, bird and butterfly local communities.

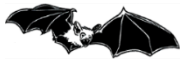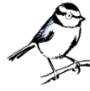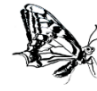

|                                  |                                |                                      |                                 |
|----------------------------------|--------------------------------|--------------------------------------|---------------------------------|
| <i>Nyctalus leisleri</i>         | <i>Coturnix coturnix</i>       | <i>Regulus ignicapilla</i>           | <i>Macroglossum stellatarum</i> |
| <i>Nyctalus noctula</i>          | <i>Alectoris rufa</i>          | <i>Regulus regulus</i>               | <i>Iphiclidides podalirius</i>  |
| <i>Eptesicus serotinus</i>       | <i>Perdix perdix</i>           | <i>Phylloscopus bonelli</i>          | <i>Papilio machaon</i>          |
| <i>Pipistrellus pipistrellus</i> | <i>Buteo buteo</i>             | <i>Phylloscopus collybita</i>        | <i>Aporia crataegi</i>          |
| <i>Pipistrellus nathusii</i>     | <i>Vanellus vanellus</i>       | <i>Phylloscopus sibilatrix</i>       | <i>Cacyreus marshalli</i>       |
| <i>Pipistrellus kuhlii</i>       | <i>Columba palumbus</i>        | <i>Phylloscopus trochilus</i>        | <i>Argynnis paphia</i>          |
| <i>Barbastella barbastellus</i>  | <i>Streptopelia decaocto</i>   | <i>Hippolais polyglotta</i>          | <i>Aglais io</i>                |
|                                  | <i>Cuculus canorus</i>         | <i>Sylvia atricapilla</i>            | <i>Aglais urticae</i>           |
|                                  | <i>Apus apus</i>               | <i>Sylvia communis</i>               | <i>Vanessa atalanta</i>         |
|                                  | <i>Upupa epops</i>             | <i>Sylvia melanocephala</i>          | <i>Vanessa cardui</i>           |
|                                  | <i>Dendrocopos major</i>       | <i>Erithacus rubecula</i>            | <i>Pararge aegeria</i>          |
|                                  | <i>Dendrocopos medius</i>      | <i>Luscinia megarhynchos</i>         | <i>Coenonympha pamphilus</i>    |
|                                  | <i>Dryocopus martius</i>       | <i>Phoenicurus ochruros</i>          | <i>Maniola jurtina</i>          |
|                                  | <i>Picus canus</i>             | <i>Phoenicurus phoenicurus</i>       | <i>Brintesia circe</i>          |
|                                  | <i>Picus viridis</i>           | <i>Saxicola rubetra</i>              |                                 |
|                                  | <i>Falco tinnunculus</i>       | <i>Saxicola rubicola</i>             |                                 |
|                                  | <i>Lanius collurio</i>         | <i>Oenanthe oenanthe</i>             |                                 |
|                                  | <i>Oriolus oriolus</i>         | <i>Turdus merula</i>                 |                                 |
|                                  | <i>Garrulus glandarius</i>     | <i>Turdus philomelos</i>             |                                 |
|                                  | <i>Pica pica</i>               | <i>Turdus viscivorus</i>             |                                 |
|                                  | <i>Corvus corone</i>           | <i>Prunella modularis</i>            |                                 |
|                                  | <i>Corvus frugilegus</i>       | <i>Motacilla flava</i>               |                                 |
|                                  | <i>Corvus monedula</i>         | <i>Anthus campestris</i>             |                                 |
|                                  | <i>Lullula arborea</i>         | <i>Anthus pratensis</i>              |                                 |
|                                  | <i>Alauda arvensis</i>         | <i>Emberiza calandra</i>             |                                 |
|                                  | <i>Galerida cristata</i>       | <i>Emberiza cirlus</i>               |                                 |
|                                  | <i>Hirundo rustica</i>         | <i>Emberiza citrinella</i>           |                                 |
|                                  | <i>Delichon urbicum</i>        | <i>Emberiza hortulana</i>            |                                 |
|                                  | <i>Periparus ater</i>          | <i>Fringilla coelebs</i>             |                                 |
|                                  | <i>Lophophanes cristatus</i>   | <i>Coccothraustes coccothraustes</i> |                                 |
|                                  | <i>Poecile palustris</i>       | <i>Pyrrhula pyrrhula</i>             |                                 |
|                                  | <i>Cyanistes caeruleus</i>     | <i>Carduelis cannabina</i>           |                                 |
|                                  | <i>Parus major</i>             | <i>Carduelis carduelis</i>           |                                 |
|                                  | <i>Parus montanus</i>          | <i>Carduelis chloris</i>             |                                 |
|                                  | <i>Sitta europaea</i>          | <i>Serinus serinus</i>               |                                 |
|                                  | <i>Certhia familiaris</i>      | <i>Passer domesticus</i>             |                                 |
|                                  | <i>Certhia brachydactyla</i>   | <i>Passer montanus</i>               |                                 |
|                                  | <i>Troglodytes troglodytes</i> |                                      |                                 |

**Supplementary Table 2.** Definition and corresponding equations of the variables used to describe the diversity and the stability of ecological communities used in the path analysis.

| Variables                                             | Definition                                                                                                                                                                                                                                                                                                     | Equation                                                   |
|-------------------------------------------------------|----------------------------------------------------------------------------------------------------------------------------------------------------------------------------------------------------------------------------------------------------------------------------------------------------------------|------------------------------------------------------------|
| Temporal stability of community total abundance       | Reflects the amplitude of inter-annual variations in the total abundance of the community in a site.                                                                                                                                                                                                           | $\frac{1}{CV} = \frac{\mu}{\sigma}$                        |
| Weighted mean population stability                    | Mean amplitude of inter-annual variations of population abundances in a community, weighted by their relative abundance.                                                                                                                                                                                       | $\frac{1}{CV_w} = \sum_i \frac{\mu \mu_i}{\mu_i \sigma_i}$ |
| Population asynchrony                                 | Reflects the negative correlation degree among species temporal abundance fluctuations in a community.                                                                                                                                                                                                         | $\frac{1}{\varphi} = \frac{(\sum_i \sigma_i)^2}{\sigma^2}$ |
| Shannon diversity                                     | Species diversity measure that takes species richness and evenness into account. In this study, we computed for each community the exponential of the Shannon index based on the total community species richness and evenness.                                                                                | $H' = - \sum_i (p_i * \ln(p_i))$                           |
| Species richness                                      | Total number of species seen at least one year during the time series. Species richness is computed for each site and each dataset.                                                                                                                                                                            |                                                            |
| Weighted or non-weighted Mean Pairwise Distance (MPD) | Reflects the phylogenetic diversity inside a community. The standard MPD is computed as the mean pairwise phylogenetic distance between species in a community. The weighted MPD is computed the same way, but distances are weighted by the product of the abundances of the species that constitute the pair |                                                            |

Footnote: With CV the coefficient of variation of community abundances,  $\mu$  the community mean abundance,  $\sigma$  the standard deviation of community abundance,  $CV_w$  the weighted mean coefficient of variation of population abundance in a community,  $\mu_i$  the mean abundance of the population  $i$  in a community and  $\sigma_i$  its standard deviation,  $\varphi$  the synchrony between population abundance fluctuation in a community,  $H'$  the Shannon index,  $n$  the species of a community and  $p_i$  the proportion of the abundance of the species  $i$  in its community.

**Supplementary Table 3.** Standardized coefficients from the Structural Equation Models on the stability of bat, bird and butterfly communities for the three buffer sizes. Est. stands for estimates. SE for standard errors. P-val. for *p*-value.

|                        |                                 | Bats                                                                          |       |        |                                                                               |       |        |                                                                                |       |        |
|------------------------|---------------------------------|-------------------------------------------------------------------------------|-------|--------|-------------------------------------------------------------------------------|-------|--------|--------------------------------------------------------------------------------|-------|--------|
|                        |                                 | 250m buffer radius<br>Fischer C= 9.31<br><i>p</i> -value= 0.503<br>AIC= 65.31 |       |        | 500m buffer radius<br>Fischer C= 9.02<br><i>p</i> -value= 0.531<br>AIC= 65.02 |       |        | 1000m buffer radius<br>Fischer C= 10.51<br><i>p</i> -value= 0.397<br>AIC=66.51 |       |        |
| Response               | Predictor                       | Est.                                                                          | SE    | P-val. | Est.                                                                          | SE    | P-val. | Est.                                                                           | SE    | P-val. |
| Species diversity      | Agricultural intensity gradient | 0.119                                                                         | 0.091 | 0.192  | 0.097                                                                         | 0.091 | 0.290  | 0.141                                                                          | 0.094 | 0.135  |
|                        | Urban gradient                  | 0.298                                                                         | 0.085 | 0.001  | 0.283                                                                         | 0.085 | 0.001  | 0.309                                                                          | 0.088 | 0.001  |
| Phylogenetic diversity | Agricultural intensity gradient | -0.187                                                                        | 0.088 | 0.035  | -0.192                                                                        | 0.087 | 0.030  | -0.211                                                                         | 0.090 | 0.021  |
|                        | Urban gradient                  | -0.181                                                                        | 0.080 | 0.026  | -0.188                                                                        | 0.080 | 0.020  | -0.174                                                                         | 0.084 | 0.040  |
| Population stability   | Agricultural intensity gradient | -0.246                                                                        | 0.091 | 0.008  | -0.254                                                                        | 0.091 | 0.006  | -0.237                                                                         | 0.096 | 0.015  |
|                        | Urban gradient                  | -0.102                                                                        | 0.091 | 0.261  | -0.105                                                                        | 0.090 | 0.244  | -0.080                                                                         | 0.093 | 0.390  |
|                        | Phylogenetic diversity          | 0.061                                                                         | 0.082 | 0.459  | 0.059                                                                         | 0.082 | 0.476  | 0.065                                                                          | 0.082 | 0.429  |
|                        | Species richness                | -0.190                                                                        | 0.081 | 0.021  | -0.192                                                                        | 0.081 | 0.019  | -0.194                                                                         | 0.081 | 0.018  |
| Population asynchrony  | Agricultural intensity gradient | 0.031                                                                         | 0.086 | 0.721  | 0.088                                                                         | 0.086 | 0.308  | 0.140                                                                          | 0.090 | 0.121  |
|                        | Urban gradient                  | -0.111                                                                        | 0.085 | 0.197  | -0.039                                                                        | 0.085 | 0.648  | 0.078                                                                          | 0.087 | 0.375  |
|                        | Phylogenetic diversity          | 0.222                                                                         | 0.077 | 0.005  | 0.243                                                                         | 0.077 | 0.002  | 0.260                                                                          | 0.077 | 0.001  |
|                        | Species richness                | 0.412                                                                         | 0.077 | 0.192  | 0.391                                                                         | 0.076 | <0.001 | 0.362                                                                          | 0.076 | <0.001 |
| Community stability    | Population asynchrony           | 0.633                                                                         |       |        | 0.633                                                                         |       |        | 0.633                                                                          |       |        |
|                        | Population stability            | 0.687                                                                         |       |        | 0.687                                                                         |       |        | 0.687                                                                          |       |        |

  

|                        |                                 | Birds                                                                          |       |        |                                                                                |       |        |                                                                                |       |        |
|------------------------|---------------------------------|--------------------------------------------------------------------------------|-------|--------|--------------------------------------------------------------------------------|-------|--------|--------------------------------------------------------------------------------|-------|--------|
|                        |                                 | 1000m buffer radius<br>Fischer C= 5.96<br><i>p</i> -value= 0.819<br>AIC= 65.96 |       |        | 1250m buffer radius<br>Fischer C= 5.56<br><i>p</i> -value= 0.851<br>AIC= 65.56 |       |        | 1500m buffer radius<br>Fischer C= 5.15<br><i>p</i> -value= 0.881<br>AIC= 65.15 |       |        |
| Response               | Predictor                       | Est.                                                                           | SE    | P-val. | Est.                                                                           | SE    | P-val. | Est.                                                                           | SE    | P-val. |
| Species diversity      | Agricultural intensity gradient | -0.229                                                                         | 0.061 | <0.001 | -0.210                                                                         | 0.062 | 0.001  | -0.187                                                                         | 0.063 | 0.003  |
|                        | Urban gradient                  | -0.117                                                                         | 0.056 | 0.038  | -0.138                                                                         | 0.057 | 0.017  | -0.163                                                                         | 0.058 | 0.006  |
| Phylogenetic diversity | Agricultural intensity gradient | 0.115                                                                          | 0.066 | 0.083  | 0.150                                                                          | 0.066 | 0.023  | 0.178                                                                          | 0.066 | 0.007  |
|                        | Urban gradient                  | -0.019                                                                         | 0.063 | 0.759  | -0.017                                                                         | 0.064 | 0.796  | -0.016                                                                         | 0.064 | 0.799  |
| Population stability   | Agricultural intensity gradient | -0.414                                                                         | 0.063 | <0.001 | -0.409                                                                         | 0.064 | <0.001 | -0.397                                                                         | 0.065 | <0.001 |
|                        | Urban gradient                  | 0.071                                                                          | 0.057 | 0.218  | 0.079                                                                          | 0.059 | 0.176  | 0.081                                                                          | 0.060 | 0.179  |
|                        | Phylogenetic diversity          | 0.023                                                                          | 0.055 | 0.680  | 0.034                                                                          | 0.055 | 0.540  | 0.041                                                                          | 0.056 | 0.462  |
|                        | Species richness                | -0.040                                                                         | 0.061 | 0.512  | -0.030                                                                         | 0.061 | 0.623  | -0.017                                                                         | 0.062 | 0.786  |
| Population asynchrony  | Agricultural intensity gradient | 0.014                                                                          | 0.061 | 0.816  | 0.011                                                                          | 0.061 | 0.857  | 0.017                                                                          | 0.061 | 0.784  |
|                        | Urban gradient                  | 0.025                                                                          | 0.059 | 0.673  | 0.041                                                                          | 0.059 | 0.494  | 0.050                                                                          | 0.059 | 0.399  |
|                        | Phylogenetic diversity          | 0.033                                                                          | 0.059 | 0.573  | 0.033                                                                          | 0.059 | 0.581  | 0.030                                                                          | 0.059 | 0.607  |
|                        | Species richness                | 0.360                                                                          | 0.060 | <0.001 | 0.363                                                                          | 0.060 | <0.001 | 0.366                                                                          | 0.060 | <0.001 |
| Community stability    | Population asynchrony           | 0.722                                                                          |       |        | 0.722                                                                          |       |        | 0.722                                                                          |       |        |
|                        | Population stability            | 0.500                                                                          |       |        | 0.500                                                                          |       |        | 0.500                                                                          |       |        |

  

|                        |                                 | Butterflies                                                                    |       |        |                                                                                |       |        |                                                                                 |       |        |
|------------------------|---------------------------------|--------------------------------------------------------------------------------|-------|--------|--------------------------------------------------------------------------------|-------|--------|---------------------------------------------------------------------------------|-------|--------|
|                        |                                 | 250m buffer radius<br>Fischer C= 20.49<br><i>p</i> -value= 0.025<br>AIC= 72.49 |       |        | 500m buffer radius<br>Fischer C= 19.44<br><i>p</i> -value= 0.035<br>AIC= 71.44 |       |        | 1000m buffer radius<br>Fischer C= 21.58<br><i>p</i> -value= 0.017<br>AIC= 73.58 |       |        |
| Response               | Predictor                       | Est.                                                                           | SE    | P-val. | Est.                                                                           | SE    | P-val. | Est.                                                                            | SE    | P-val. |
| Species diversity      | Agricultural intensity gradient | -0.085                                                                         | 0.084 | 0.316  | -0.131                                                                         | 0.082 | 0.111  | -0.184                                                                          | 0.079 | 0.021  |
|                        | Urban gradient                  | -0.297                                                                         | 0.084 | 0.001  | -0.366                                                                         | 0.082 | <0.001 | -0.439                                                                          | 0.079 | <0.001 |
| Phylogenetic diversity | Agricultural intensity gradient | -0.049                                                                         | 0.062 | 0.429  | -0.059                                                                         | 0.064 | 0.358  | -0.045                                                                          | 0.067 | 0.510  |
|                        | Urban gradient                  | 0.227                                                                          | 0.062 | <0.001 | 0.258                                                                          | 0.061 | <0.001 | 0.239                                                                           | 0.062 | <0.001 |
| Population stability   | Agricultural intensity gradient | 0.085                                                                          | 0.081 | 0.294  | 0.047                                                                          | 0.083 | 0.575  | 0.006                                                                           | 0.084 | 0.948  |
|                        | Urban gradient                  | -0.374                                                                         | 0.085 | <0.001 | -0.366                                                                         | 0.089 | <0.001 | -0.394                                                                          | 0.090 | <0.001 |
|                        | Phylogenetic diversity          | 0.192                                                                          | 0.082 | 0.020  | 0.202                                                                          | 0.084 | 0.019  | 0.191                                                                           | 0.084 | 0.025  |
|                        | Species richness                | 0.158                                                                          | 0.084 | 0.062  | 0.133                                                                          | 0.087 | 0.131  | 0.095                                                                           | 0.090 | 0.294  |
| Population asynchrony  | Agricultural intensity gradient | 0.139                                                                          | 0.085 | 0.106  | 0.176                                                                          | 0.086 | 0.042  | 0.186                                                                           | 0.087 | 0.035  |
|                        | Urban gradient                  | 0.045                                                                          | 0.089 | 0.616  | 0.102                                                                          | 0.091 | 0.268  | 0.118                                                                           | 0.094 | 0.212  |
|                        | Phylogenetic diversity          | 0.254                                                                          | 0.086 | 0.004  | 0.257                                                                          | 0.087 | 0.004  | 0.268                                                                           | 0.087 | 0.003  |
|                        | Species richness                | 0.247                                                                          | 0.088 | 0.006  | 0.283                                                                          | 0.090 | 0.002  | 0.299                                                                           | 0.093 | 0.002  |
| Community stability    | Population asynchrony           | 0.637                                                                          |       |        | 0.637                                                                          |       |        | 0.637                                                                           |       |        |
|                        | Population stability            | 0.710                                                                          |       |        | 0.710                                                                          |       |        | 0.710                                                                           |       |        |

**Supplementary Table 4.** GeneBank accession numbers of genes used to generate the phylogeny of butterflies.

| Species                         | COI      | wingless | Gene          |          |          |
|---------------------------------|----------|----------|---------------|----------|----------|
|                                 |          |          | EF-1 $\alpha$ | GAPDH    | RpS5     |
| <i>Aglais urticae</i>           | HQ003951 | AF412777 | AY248811      | FJ639522 | FJ639577 |
| <i>Aporia crataegi</i>          | HM393180 | EU141242 | AY870529      | EU141496 | EU141394 |
| <i>Argynnis paphia</i>          | FJ663298 | AY090133 | GU372616      | EU141519 | EU141421 |
| <i>Brintesia circe</i>          | HQ004137 | DQ338729 | DQ339020      | EU141474 | EU141370 |
| <i>Cacyreus marshalli</i>       | AY556966 | GQ128914 | GQ128703      |          |          |
| <i>Coenonympha pamphilus</i>    | GU707174 | DQ338637 | DQ338920      | EU528385 | EU528428 |
| <i>Inachis io</i>               | FJ663678 | AF412766 | AY248810      | FJ639521 | FJ639576 |
| <i>Iphiclides podalirius</i>    | GU559736 | DQ351129 | AF173413      |          |          |
| <i>Macroglossum stellatarum</i> | JF415393 | EU479508 | EU479296      |          |          |
| <i>Maniola jurtina</i>          | FJ663756 | AY090147 | AY090180      | EU141481 | EU141376 |
| <i>Papilio machaon</i>          | HQ004884 | AY569124 | AF044828      |          |          |
| <i>Pararge aegeria</i>          | GU655008 | DQ176340 | DQ338913      | EU141476 | EU141372 |
| <i>Vanessa atalanta</i>         | FJ664079 | HQ734826 | AY090187      | HQ734959 | HQ735034 |
| <i>Vanessa cardui</i>           | HQ990383 | HQ734828 | HQ734947      | HQ734971 | HQ735047 |

**Supplementary Table 5.** Variables used to describe the landscape surrounding the study sites. The urban, cropland, heterogenous agricultural, woodland and semi-natural open areas. CLC is for Corine Land Cover.

| Data                             | Description                                     | CLC Code                             | Units          |
|----------------------------------|-------------------------------------------------|--------------------------------------|----------------|
| Soil sealing                     | Sealed soil                                     |                                      | m <sup>2</sup> |
| Agricultural inputs              | Fertilizers                                     |                                      | k€             |
|                                  | Pesticides                                      |                                      | k€             |
|                                  | Livestock food                                  |                                      | k€             |
|                                  | Veterinarian medics                             |                                      | k€             |
|                                  | Landscape complexity                            | Shannon index based on CLC land-uses | 111-524        |
| Urban area                       | Artificial surfaces                             | 111-142                              | m <sup>2</sup> |
| Cropland area                    | Arable land                                     | 211-213                              | m <sup>2</sup> |
|                                  | Permanent crops                                 | 221-223                              | m <sup>2</sup> |
| Heterogeneous agricultural areas | Pastures                                        | 231                                  | m <sup>2</sup> |
|                                  | Heterogeneous agricultural areas                | 241-244                              | m <sup>2</sup> |
| Woodland area                    | Forests                                         | 311-313                              | m <sup>2</sup> |
| Semi-natural open area           | Scrub and/or herbaceous vegetation associations | 321-324                              | m <sup>2</sup> |

## References

1. Shi, J. J. & Rabosky, D. L. Speciation dynamics during the global radiation of extant bats. *Evolution* **69**, 1528–1545 (2015).
