# Supplementary material for: Urbanization and agricultural intensification destabilize animal communities differently than diversity loss
Source: PubMed Central journal article supplement (PMC7264125; doi:10.1038/s41467-020-16240-6), 2020-06-01
Supplement: 41467_2020_16240_MOESM2_ESM.pdf [file 41467_2020_16240_MOESM2_ESM.pdf]

## Peer Review File -

Reviewers' comments:

Reviewer #1 (Remarks to the Author):

This paper examines data from three citizen science projects (birds, bats, butterflies), to see whether species diversity (within taxonomic groups) and habitat degradation (conversion of surrounding habitat) affect community stability (within same taxonomic groups). Similar research has been carried out with plant communities and the authors consider the lack of such studies on animal communities to be an important research gap to fill. The authors use structural equation modeling to tease apart pathways affecting community dynamics. They report that species diversity affects the synchrony of populations and habitat degradation (conversion of surrounding landscapes to agriculture and urban areas) affects the stability of populations.

Overall the findings are interesting and an important contribution to understanding large-scale patterns in community dynamics. I encourage the authors to provide more clarity in terms in order to speak to a broader readership. A table of definitions (ecological and statistical) would be helpful.

The paper could be improved by drawing more on natural histories of the species studied to inform analyses.

I appreciate that the authors were thorough in analyzing data with different landscape buffer sizes, but the landcover data was from 2006 and the agricultural intensity data from 2006-2013, and I wonder how failing to meet assumptions of static landscapes affects the study. The authors could also make it more clear the composition of the focal habitats for each species community.

The citizen science projects are exemplary programs that provide reliable data. I'm concerned about the use of BBS data for the purposes of the paper because the BBS protocol involves fixed dates over years and the data were largely influenced by fall and spring migrants which may have shifted the timing of their migration in response to climate change.

For a paper examining mechanisms of community dynamics, I find it a limitation that communities were examined within taxonomic silos. Species depend on species in other taxonomic groups, so why would we expect the diversity of one taxonomic group to be of high importance in affecting the stability of that same taxonomic group? Related, the authors are vague on the focal habitat type for the taxonomic groups studied --- do they all share the same habitat?

A confusing point for me relates to how (or when) the surrounding landscape was measured. The authors use landcover data from 2006. I've never been to France and so I don't know if the landscape is no longer being converted into new landuses, but a static landscape seems an unlikely assumption. Could the landscape really not have changed over the years of the study (6, 11, 17 years)? The authors also use a value related to the mean agricultural spending between 2006-2013 as index of agricultural intensification, though citizen science data on species abundance were collected through 2018. With the landscape data, the authors measure habitat conversion around focal sites and make implicit assumption about habitat conversion leading to habitat degradation. They should make those assumptions explicit, or confine inferences to the effects of the surrounding habitat conversion (which is related to habitat loss, connectivity, and other landscape features in addition to potential degradation of habitat that remains). Specifically, they assume urbanization is a detriment to semi-natural and agricultural areas while agricultural intensification is a detriment to woodland and semi-natural areas. Why wouldn't agricultural intensification, like urbanization, also be a detriment to agricultural areas? While at least some details are provided about the buffer habitats, I could not find details about the focal habitats. For example, for the bat samples, how many local pops were in each of the different land cover types? For bird samples, how many BBS plots were distributed in which habitat types? Ditto for butterfly garden counts. For a paper examining mechanistic aspects of community dynamics, the authors are vague on natural histories of the taxon studied, and those natural histories are necessary to

make sense of their results. How would it affect the results if some butterfly species had metapopulation dynamics in which "stability" manifests as localized boom-bust dynamics followed by re-colonization events?

With regard to the citizen science projects, the three selected have standardized protocols and long-term data which are two features that favor data quality. As the authors point out, the bat survey is biased for roads with low traffic. I could not find information about the focal habitat for the 152 local bat communities studied. The project requires quite a bit of work from volunteers which leads me to strongly suspect the competent volunteers remain and provide reliable and trustworthy data.

The Birding Bird Survey is 2x2km<sup>2</sup> plots randomly selected in which 10 survey points to cover range of habitat types within a given plot (but again, not clear details about the proportions of these habitats in the final sample). The BBS involves sampling twice per year on exactly the same dates per site per year, during fall and spring migration which means that these data do not represent the local community of birds, but migrants passing through. Again I suspect this intense project attracts highly competent birders capable of providing reliable and trustworthy data. However, the timing of avian migration peaks have been found to change in response to climate change in some areas, and with a large component of abundance being migrants, it raises question about whether trends in abundance reflect local changes or changes in timing of migration for these 269 bird communities – which they call "local bird communities" but not clear to me whether they excluded migrants.

The Butterfly data come from "gardens" which are residential habitat. The authors are appropriately conservative in restricting the butterfly/month species because identification by volunteers for some is difficult.

Reviewer #2 (Remarks to the Author):

The major claims of this paper is that human land use and species diversity have similar effects on the destabilization of animal communities. The relationship between human impacts on diversity and community stability has been a topic of study for decades in ecology. As such, this paper is on an important topic. However, what the authors present is not groundbreaking. They do look at stability and diversity in a couple of ways, but there is no mechanism. It is a nice empirical study, but I do not know what more it provides than, for example, Blüthgen, Nico, et al. "Land use imperils plant and animal community stability through changes in asynchrony rather than diversity." *Nature Communications* 7 (2016): 10697.

Comments

1. The authors performed a regression on of weighted MPD on SR. Why was a phylogenetic metric that includes species abundances chosen? What is the relationship between unweighted MPD and community stability? Including abundances into an explanatory variable introduces statistical independence biases (i.e., including an independent variable that derived from the dependent variable). The residuals (see figure S15) may certainly help reduce independence biases but then one must assume that the regressions that produced the MPD residuals well fit the data. If the authors want to use the weighted metric, then instead of richness they should use a diversity metric instead. Regardless of choice, the authors must include the unweighted MPD metric as this is more analogous to the SR metric and is the metric most often used. Note that the expectation of unweighted MPD is not dependent on SR (the actual values are but the expectation is not), thus it is less likely that the authors would need to

2. How were the species in the analyses chosen? The authors indicate they only used common species, but where is the cutoff and does this cutoff influence the metrics of community stability? Are the more diverse communities more likely to have rare species that were removed from the analyses and does including these rare species influence the relationships?

3. Statistically, as SR decreases CV will increase and thus, SR should have a negative relationship with community stability as measured by  $1/CV$ . How then do the authors account for the statistical artifact of lower SR along urbanization and agriculture gradients? Figure 2 does not deal with this issue and the SEM may not as well. I say may not because SEMs are still prone to collinearity issues like any standard regression, but the effect of collinearity must be assessed for any model (it does not seem as if the authors did this check). An often used method is to devise a randomization and thus model (and plot) standardized effect sizes.

4. Comments on figures and tables: Table 1 is not a visually useful presentation of the results. Consider bar charts with errors so show the difference in magnitude. Figure 1: the magnitude of total abundance is so large that you cannot see how the individual species vary. Try plotting two y axes, log transform, or broken y axis. Figure 2: why are only some of the relationships plotted here? The x axis in c is difficult to see the bat data. Perhaps try plotting z scores of richness for each of the data sets.

#### Reviewer #3 (Remarks to the Author):

This paper is using citizen science biodiversity monitoring data to assess how habitat degradation and urbanization influence the stability of ecological communities, and the relative roles of decreasing population stability and synchrony on community stability. I appreciate the innovative approach, but have some serious doubts both about the data used and regarding the interpretation of the results.

The authors are using monitoring data on birds, bats and butterflies collected by citizen scientists to assess community stability over time. However, the time series for bats is quite short for this types of analyses. According to the authors (lines 290-291) the bat data consist of time series on only 4-6 years. This is very short in an ecological context, and is unlikely to include the full variability of bat communities. Hence, it is likely that they are under-estimating the community variability.

The butterfly data does not consists of surveys of the full community. Instead, citizen scientists are recording species on a "closed list of 28 common species or species groups" (line 278), of which only 14 were used in the analyses. This is probably far from the full set of species encountered over a period of 7-11 years, even in urban environments. The authors state that "the temporal variability of the butterfly community restricted to these 14 species reflects that of the entire community" (lines 282-283). It is however unclear if they by "the entire community" here actually refer to the 28 common "species or species groups", or if they actually refer to the full community. Since they probably only have data on the 28 species or species groups I assume that this is what they refer to. If so, I find it misleading to say that "the temporal variability of the butterfly community restricted to these 14 species reflects that of the entire community". And more importantly, since they do only sample a subset consisting of common species, I find it likely that they are under-estimating the community variability.

For these reasons, there is a considerable risk that the authors are under-estimating the variability of both bat and butterfly communities, with unknown consequences for the main conclusions.

#### Further comments on the data:

- Butterflies were monitored in residential gardens. Yet most of the monitored species are unlikely to actually breed in many of these gardens, but rather use them for foraging only. So, if only a part of their habitat is monitored it is unclear what the inter-annual variability in community composition actually means.
- Also, the monitored species include two migratory species (*Vanessa atalanta* and *V. cardui*), of which at least *V. cardui* is unlikely to overwinter in France, and the population variability depends mainly on conditions in North Africa and the Mediterranean region.

#### Other major comments:

In the abstract, the authors state that both population synchrony and population stability have effects on community stability, but through different drivers, i.e. are important, but that diversity loss is mainly affecting synchrony and habitat degradation mainly decreases population stability.

Yet, in the main text the authors mainly discuss the effects of habitat degradation on stability, and very little about diversity and synchrony. This inconsistency needs to be resolved.

The different environmental drivers are estimated at different spatial scales. Landscape variables are assessed within radii of 250, 500 and 1000 m for bird and butterflies and in squares of 2-3 km for birds. In contrast, agricultural intensity variables are assessed with administrative regions (of unclear size, but probably much larger than the areas for which the landscape variables are assessed). This means that it is problematic to conclude that "while butterfly community stability is mainly impacted by urbanization, bird and bat communities are mostly destabilized by agricultural intensification...". In reality, it might instead be that butterfly communities are impacted by (any) drivers at smaller spatial scales while bird and bat communities are impacted by (any) drivers at larger spatial scales.

Also, the radii of 250-1000 m seems quite small for butterflies and especially for bats, which are flying over rather large

Minor comments:

- I would like to see something about methods or the type of data used in the Abstract.

- Lines 285-286: "...gardens that had been monitored in July..." Does this mean that only data from July was included in the analyses? But several of the butterfly species are active mainly during other parts of the year??

- Line 377: Why did you use Corine Land cover data from 2006, and not more recent data (which I believe should be available).

1 **Reviewer #1:**

2  
3 **This paper examines data from three citizen science projects (birds, bats, butterflies), to see**  
4 **whether species diversity (within taxonomic groups) and habitat degradation (conversion of**  
5 **surrounding habitat) affect community stability (within same taxonomic groups). Similar**  
6 **research has been carried out with plant communities and the authors consider the lack of such**  
7 **studies on animal communities to be an important research gap to fill. The author use structural**  
8 **equation modeling to tease apart pathways affecting community dynamics. They report that**  
9 **species diversity affects the synchrony of populations and habitat degradation (conversion of**  
10 **surrounding landscapes to agriculture and urban areas) affects the stability of populations.**

11  
12 **#1. Overall the findings are interesting and an important contribution to understanding large-**  
13 **scale patterns in community dynamics. I encourage the authors to provide more clarity in terms**  
14 **in order to speak to a broader readership. A table of definitions (ecological and statistical) would**  
15 **be helpful.**

16  
17 We added a supplementary table with ecological and statistical definitions in the manuscript  
18 (supplementary Table 2):  
19

|                                                       | Definition                                                                                                                                                                                                                                                                                                     | Equation                                                     |
|-------------------------------------------------------|----------------------------------------------------------------------------------------------------------------------------------------------------------------------------------------------------------------------------------------------------------------------------------------------------------------|--------------------------------------------------------------|
| Temporal stability of community total abundance       | Reflects the amplitude of inter-annual variations in the total abundance of the community in a site.                                                                                                                                                                                                           | $\frac{1}{CV} = \frac{\mu}{\sigma}$                          |
| Weighted mean population stability                    | Mean amplitude of inter-annual variations of population abundances in a community, weighted by their relative abundance.                                                                                                                                                                                       | $\frac{1}{CV_w} = \sum_i \frac{\mu_i \mu_i}{\mu_i \sigma_i}$ |
| Population asynchrony                                 | Reflects the negative correlation degree among species temporal abundance fluctuations in a community.                                                                                                                                                                                                         | $\frac{1}{\varphi} = \frac{(\sum_i \sigma_i)^2}{\sigma^2}$   |
| Shannon diversity                                     | Species diversity measure that takes species richness and evenness into account. In this study, we computed for each community the exponential of the Shannon index based on the total community species richness and evenness.                                                                                | $H' = - \sum_{n=1}^n (p_i * \ln(p_i))$                       |
| Species richness                                      | Total number of species seen at least one year during the time series. Species richness is computed for each site and each dataset.                                                                                                                                                                            |                                                              |
| Weighted or non-weighted Mean Pairwise Distance (MPD) | Reflects the phylogenetic diversity inside a community. The standard MPD is computed as the mean pairwise phylogenetic distance between species in a community. The weighted MPD is computed the same way, but distances are weighted by the product of the abundances of the species that constitute the pair |                                                              |

20 Footnote: With CV the coefficient of variation of community abundances,  $\mu$  the community  
21 mean abundance,  $\sigma$  the standard deviation of community abundance,  $CV_w$  the weighted mean  
22 coefficient of variation of population abundance in a community,  $\mu_i$  the mean abundance of  
23 the population  $i$  in a community and  $\sigma_i$  its standard deviation,  $\varphi$  the synchrony between  
24 population abundance fluctuation in a community,  $H'$  the Shannon index,  $n$  the species of a  
25 community and  $p_i$  the proportion of the abundance of the species  $i$  in its community.

26  
27  
28 **#2. The paper could be improved by drawing more on natural histories of the species studied to**  
29 **inform analyses.**

30  
31 We agree that the natural history of the species studied can inform our analysis and help to interpret  
32 the results. However, we also think that the main strength of the paper is to show common patterns

33 among taxa with very different natural history and that highlighting too much the peculiarities of each  
34 taxa may blur the main message. To account for this point, we made the following changes in the main  
35 text:

36 Line 57-61

37 “While bats and insectivorous birds are recognized as important for pest control<sup>17,18</sup>, butterflies  
38 contribute to pollination<sup>19</sup> and frugivorous birds are essential for plant dispersal<sup>18</sup>. As such,  
39 understanding what determine the stability of these communities might be relevant to understand the  
40 stability of the functions and services they provide.”

41 Lines 112-116

42 “This extends classical results found for experimental plant communities<sup>4,5</sup> to animal taxa with very  
43 different natural history and there by suggest that the positive biodiversity-stability relationship found  
44 for primary production apply to other functions and services provided by various animal  
45 communities.”

46

47

48 **#3. I appreciate that the authors were thorough in analyzing data with different landscape**  
49 **buffer sizes, but the landcover data was from 2006 and the agricultural intensity data from**  
50 **2006-2013, and I wonder how failing to meet assumptions of static landscapes affects the study.**

51

52 The reviewer raises an important point. We agree that while the landscape context, i.e., the amount of  
53 degraded land around the study sites, can affect the stability of animal communities, its variation  
54 during the monitoring period could also have an effect.

55

56 To assess the extent to which landscape modification occurred in our monitored sites throughout the  
57 study periods, we looked at changes in the land cover using the Corine Land Cover database that is  
58 available for the years 2000, 2006, 2012 and 2018. Using the same buffers surrounding the monitoring  
59 sites as in the main analysis, we quantified the percentage of area that change for one land-use to  
60 another between the years 2000 and 2018 for the birds communities, 2006 and 2012 for the bat  
61 communities, 2006 and 2018 for the butterfly communities. We chose these periods from the available  
62 data to be the closest to the monitoring period for each taxonomic group (see figure R1 below).

63

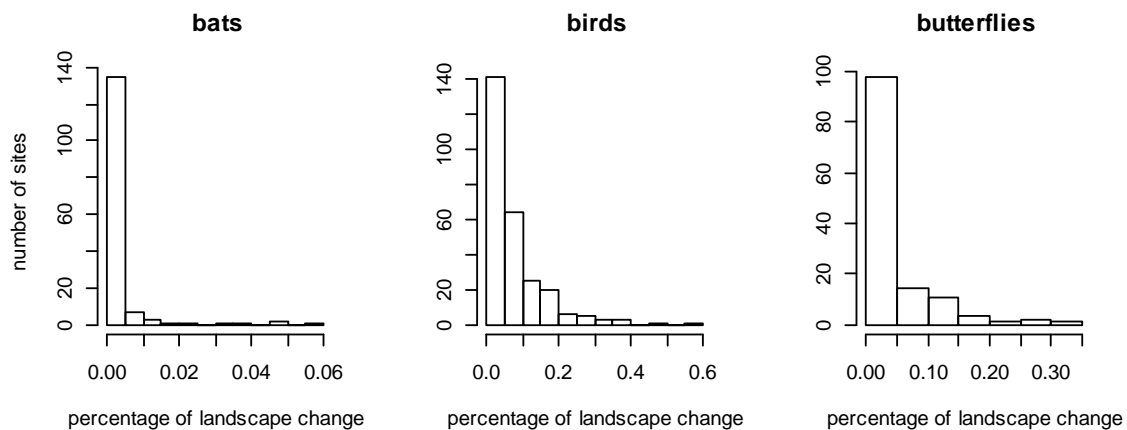

64

65 Figure R1: Distributions of the amount of landscape surrounding the study sites that have changed  
66 during the study period for each studied taxa.

67

68 Our analysis indicates that more than 99%, 76% and 86% of the monitoring sites experience less than  
69 10% change in the landscape surrounding them, for bats, birds and butterflies, respectively. Therefore,  
70 for a large majority of our sites, the hypothesis of static landscape around our study site does not seem  
71 inadequate.

72

73 However, to follow the reviewer's concerns on the time-period covered by our landscape variables, we  
74 modified our analyses to better reflect the landscape characteristics around our study sites over the  
75 whole period of monitoring. For bird communities, as time series span from 2001 to 2017, we  
76 measured the average percentages of cover occupied by the five land-use from Corine Land Cover  
77 database over the years 2000, 2006, 2012 and 2018. We also updated the agricultural inputs variable  
78 and used the average of agricultural inputs between 2001 and 2016 (data is not available for the years  
79 2017 and 2018). Similarly, for bats, as time series span from 2006 to 2012, we used the average  
80 percentages of cover from the Corine Land Cover databases for the years 2006 and 2012, as well as  
81 the agricultural inputs average over the years 2006 to 2012. For butterflies, which time series span  
82 from 2007 to 2018, we used the average percentages of cover for the Corine Land Cover databases for  
83 the years 2006, 2012 and 2018 as well as the average of agricultural inputs between 2007 and 2016.  
84 We now present these new analyses in the main text and in the supplementary materials. Please note  
85 that our results were mostly unchanged by these modifications of the landscape variables in our  
86 analysis (see Table below comparing the results of the analyses now presented in the main text with  
87 similar analyses but with previously used landscape variables).  
88

| Taxa        | Response               | Predictor                             | Main analyses with updated landscape variables |              |              | Same analyses with previous landscape variables |              |              |
|-------------|------------------------|---------------------------------------|------------------------------------------------|--------------|--------------|-------------------------------------------------|--------------|--------------|
|             |                        |                                       | Est.                                           | SE           | P-val        | Est.                                            | SE           | P-val        |
| Birds       | Species diversity      | Agricultural intensification gradient | <b>-0.187</b>                                  | <b>0.063</b> | <b>0.003</b> | <b>-0.312</b>                                   | <b>0.074</b> | <b>0.000</b> |
|             | Species diversity      | Urbanization gradient                 | <b>-0.163</b>                                  | <b>0.058</b> | <b>0.006</b> | <b>-0.177</b>                                   | <b>0.055</b> | <b>0.002</b> |
|             | Phylogenetic diversity | Agricultural intensification gradient | <b>0.178</b>                                   | <b>0.066</b> | <b>0.007</b> | <b>0.210</b>                                    | <b>0.076</b> | <b>0.006</b> |
|             | Phylogenetic diversity | Urbanization gradient                 | -0.016                                         | 0.064        | 0.799        | -0.008                                          | 0.063        | 0.905        |
|             | Population stability   | Agricultural intensification gradient | <b>-0.397</b>                                  | <b>0.065</b> | <b>0.000</b> | <b>-0.419</b>                                   | <b>0.082</b> | <b>0.000</b> |
|             | Population stability   | Urbanization gradient                 | 0.081                                          | 0.060        | 0.179        | 0.041                                           | 0.059        | 0.491        |
|             | Population stability   | Phylogenetic diversity                | 0.041                                          | 0.056        | 0.462        | 0.035                                           | 0.057        | 0.533        |
|             | Population stability   | Species diversity                     | -0.017                                         | 0.062        | 0.786        | -0.036                                          | 0.064        | 0.577        |
|             | Population asynchrony  | Agricultural intensification gradient | 0.017                                          | 0.061        | 0.784        | 0.049                                           | 0.062        | 0.429        |
|             | Population asynchrony  | Urbanization gradient                 | 0.050                                          | 0.059        | 0.399        | 0.049                                           | 0.060        | 0.419        |
|             | Population asynchrony  | Phylogenetic diversity                | 0.030                                          | 0.059        | 0.607        | 0.024                                           | 0.059        | 0.684        |
|             | Population asynchrony  | Species diversity                     | <b>0.366</b>                                   | <b>0.060</b> | <b>0.000</b> | <b>0.377</b>                                    | <b>0.062</b> | <b>0.000</b> |
|             | Community stability    | Population asynchrony                 | <b>0.722</b>                                   | <b>0.000</b> | <b>0.000</b> | <b>0.722</b>                                    | <b>0.000</b> | <b>0.000</b> |
|             | Community stability    | Population stability                  | <b>0.500</b>                                   | <b>0.000</b> | <b>0.000</b> | <b>0.500</b>                                    | <b>0.000</b> | <b>0.000</b> |
| Butterflies | Species diversity      | Agricultural intensification gradient | -0.131                                         | 0.082        | 0.111        | -0.152                                          | 0.083        | 0.071        |
|             | Species diversity      | Urbanization gradient                 | <b>-0.366</b>                                  | <b>0.082</b> | <b>0.000</b> | <b>-0.314</b>                                   | <b>0.083</b> | <b>0.000</b> |
|             | Phylogenetic diversity | Agricultural intensification gradient | -0.059                                         | 0.064        | 0.358        | -0.035                                          | 0.069        | 0.616        |
|             | Phylogenetic diversity | Urbanization gradient                 | <b>0.258</b>                                   | <b>0.061</b> | <b>0.000</b> | <b>0.263</b>                                    | <b>0.061</b> | <b>0.000</b> |
|             | Population stability   | Agricultural intensification gradient | 0.047                                          | 0.083        | 0.575        | 0.030                                           | 0.085        | 0.727        |
|             | Population stability   | Urbanization gradient                 | <b>-0.366</b>                                  | <b>0.089</b> | <b>0.000</b> | <b>-0.389</b>                                   | <b>0.087</b> | <b>0.000</b> |
|             | Population stability   | Phylogenetic diversity                | <b>0.202</b>                                   | <b>0.084</b> | <b>0.019</b> | <b>0.207</b>                                    | <b>0.086</b> | <b>0.018</b> |
|             | Population stability   | Species diversity                     | 0.133                                          | 0.087        | 0.131        | 0.140                                           | 0.085        | 0.104        |
|             | Population asynchrony  | Agricultural intensification gradient | 0.176                                          | 0.086        | 0.042        | 0.126                                           | 0.090        | 0.163        |
|             | Population asynchrony  | Urbanization gradient                 | 0.102                                          | 0.091        | 0.268        | 0.086                                           | 0.091        | 0.347        |
|             | Population asynchrony  | Phylogenetic diversity                | <b>0.257</b>                                   | <b>0.087</b> | <b>0.004</b> | <b>0.258</b>                                    | <b>0.090</b> | <b>0.005</b> |
|             | Population asynchrony  | Species diversity                     | <b>0.283</b>                                   | <b>0.090</b> | <b>0.002</b> | <b>0.271</b>                                    | <b>0.090</b> | <b>0.003</b> |
|             | Community stability    | Population asynchrony                 | <b>0.637</b>                                   | <b>0.000</b> | <b>0.000</b> | <b>0.637</b>                                    | <b>0.000</b> | <b>0.000</b> |
|             | Community stability    | Population stability                  | <b>0.710</b>                                   | <b>0.000</b> | <b>0.000</b> | <b>0.710</b>                                    | <b>0.000</b> | <b>0.000</b> |

|             |                        |                                       |               |              |              |               |              |              |
|-------------|------------------------|---------------------------------------|---------------|--------------|--------------|---------------|--------------|--------------|
| <b>Bats</b> | Species diversity      | Agricultural intensification gradient | 0.097         | 0.091        | 0.290        | <b>0.202</b>  | <b>0.080</b> | <b>0.012</b> |
|             | Species diversity      | Urbanization gradient                 | <b>0.283</b>  | <b>0.085</b> | <b>0.001</b> | <b>0.313</b>  | <b>0.080</b> | <b>0.000</b> |
|             | Phylogenetic diversity | Agricultural intensification gradient | <b>-0.192</b> | <b>0.087</b> | <b>0.030</b> | <b>-0.416</b> | <b>0.077</b> | <b>0.000</b> |
|             | Phylogenetic diversity | Urbanization gradient                 | <b>-0.188</b> | <b>0.080</b> | <b>0.020</b> | <b>-0.239</b> | <b>0.077</b> | <b>0.002</b> |
|             | Population stability   | Agricultural intensification gradient | <b>-0.254</b> | <b>0.091</b> | <b>0.006</b> | <b>-0.226</b> | <b>0.091</b> | <b>0.014</b> |
|             | Population stability   | Urbanization gradient                 | -0.105        | 0.090        | 0.244        | -0.097        | 0.088        | 0.270        |
|             | Population stability   | Phylogenetic diversity                | 0.059         | 0.082        | 0.476        | 0.037         | 0.087        | 0.668        |
|             | Population stability   | Species diversity                     | <b>-0.192</b> | <b>0.081</b> | <b>0.019</b> | <b>-0.175</b> | <b>0.083</b> | <b>0.037</b> |
|             | Population asynchrony  | Agricultural intensification gradient | 0.088         | 0.086        | 0.308        | 0.078         | 0.085        | 0.363        |
|             | Population asynchrony  | Urbanization gradient                 | -0.039        | 0.085        | 0.648        | -0.045        | 0.083        | 0.588        |
|             | Population asynchrony  | Phylogenetic diversity                | <b>0.243</b>  | <b>0.077</b> | <b>0.002</b> | <b>0.243</b>  | <b>0.082</b> | <b>0.003</b> |
|             | Population asynchrony  | Species diversity                     | <b>0.391</b>  | <b>0.076</b> | <b>0.000</b> | <b>0.390</b>  | <b>0.078</b> | <b>0.000</b> |
|             | Community stability    | Population asynchrony                 | <b>0.633</b>  | <b>0.000</b> | <b>0.000</b> | <b>0.633</b>  | <b>0.000</b> | <b>0.000</b> |
|             | Community stability    | Population stability                  | <b>0.687</b>  | <b>0.000</b> | <b>0.000</b> | <b>0.687</b>  | <b>0.000</b> | <b>0.000</b> |

89  
90  
91  
92  
93  
94  
95  
96  
97  
98  
99  
100  
101  
102  
103  
104  
105  
106  
107  
108  
109  
110  
111  
112  
113  
114  
115  
116  
117  
118  
119  
120  
121  
122  
123  
124  
125  
126

**#4. The authors could also make it more clear the composition of the focal habitats for each species community.**

Except for the butterfly monitoring scheme, the monitoring programs do not target specific habitats. Instead, observers were given random locations where to monitor bats or birds. The idea being that all habitats and landscape contexts should be monitored and random locations should lead to sample landscape and habitat proportionally to their area in a given region. Because of this sampling plan design, there is no focal habitat for bird and bat communities: all habitats were sampled proportionally to their surface. For the butterfly monitoring scheme, only private garden were monitored, these gardens being surrounded by various types of landscapes, from urban to rural. For all three taxa, the presence of potential habitats at monitoring sites is characterized by the landscape data that are summarized in the two first axes of the principal component analysis.

To clarify this point, we added the following sentences to the description of the protocols:

For bats:

“These circuits were chosen to be close of the volunteer residency, with low-traffic roads for security and representative of the different land-cover types in the area.”

For birds:

“Plots are squares of 2x2km<sup>2</sup> randomly selected by the national coordinator, within which the surveyor places 10 points separated by at least 300m, in order to cover all the habitats present in the plot.”

For butterflies:

“Participants identify and count Lepidoptera in their own garden.”

See also our response to comment # 8 of reviewer 1 where we clarified the way landscape context is analysed.

**#5. The citizen science projects are exemplary programs that provide reliable data. I'm concerned about the use of BBS data for the purposes of the paper because the BBS protocol involves fixed dates over years and the data were largely influenced by fall and spring migrants which may have shifted the timing of their migration in response to climate change.**

The French Breeding Bird Survey program is based on records only during the spring period and not during the fall period, avoiding an influence of fall migrants. Moreover, the two sessions required in this program have to be done over a 3-month period (from April 1<sup>st</sup> to June 30<sup>th</sup>), one before 8 May, the second one after, and have to be separated by at least 4 weeks. For a given site, survey dates have to be the same over the years, with a tolerance of a +/- 5 days, to allow for observer availability (most



127 observers are volunteers who participate on their spare time) and weather conditions. This information  
128 is present in the description of the bird monitoring program in the method section (lines 413-418).

129  
130 Previous studies found that bird migrants arrived at their breeding grounds on average 2 days per  
131 decade earlier (Bitterlin and Buskirk, 2014; Gienapp et al., 2007; Lehikoinen et al., 2004; Rubolini et  
132 al., 2007; Usui et al., 2017). Over the seventeen years of the monitoring period used in this study  
133 (2001-2018) the shift of migrating dates due to climate change is therefore less than four days, i.e. less  
134 than the shift of monitoring dates allowed by the protocol. It seems thus unlikely that shifts in arrival  
135 dates bias our data.

136  
137  
138 **#6. For a paper examining mechanisms of community dynamics, I find it a limitation that**  
139 **communities were examined within taxonomic silos. Species depend on species in other**  
140 **taxonomic groups, so why would we expect the diversity of one taxonomic group to be of high**  
141 **importance in affecting the stability of that same taxonomic group? Related, the authors are**  
142 **vague on the focal habitat type for the taxonomic groups studied --- do they all share the same**  
143 **habitat?**

144  
145 We agree with the reviewer that analysing the three communities together would be excellent.  
146 However, the data comes from three different citizen science programs; each one focalised on a given  
147 taxonomic group. As a consequence each site provides data for only one taxonomic group, making it  
148 impossible to analyse the effect of one taxonomic group on the others.

149  
150 We modified the main text to make sure that readers understand that each site contains only one  
151 taxonomic group counts, by adding the following sentence line 55-57:

152 “The three taxonomic groups were not monitored on the same sites as data come from three  
153 independent citizen science programs.”

154  
155 Regarding the focal habitat, see our response to comment # 4 reviewer # 1 and response to comment #  
156 3 reviewer # 3

157  
158 **#7. A confusing point for me relates to how (or when) the surrounding landscape was measured.**  
159 **The authors use landcover data from 2006. I’ve never been to France and so I don’t know if the**  
160 **landscape is no longer being converted into new landuses, but a static landscape seems an**  
161 **unlikely assumption. Could the landscape really not have changed over the years of the study**  
162 **(6, 11, 17 years)? The authors also use a value related to the mean agricultural spending between**  
163 **2006-2013 as index of agricultural intensification, though citizen science data on species**  
164 **abundance were collected through 2018.**

165  
166 As outlined in our response to comment #3 of reviewer 1, we now include additional land cover data  
167 (Corine Land Cover for 2000, 2006, 2012 and 2018) as well as additional data on mean agricultural  
168 inputs between 2001 and 2016 in order to better quantify average landscape variables over the whole  
169 monitoring periods of the different communities. We modified the methods in relation to these  
170 changes (lines 425-466) and now explain more precisely how the surrounding landscape was  
171 measured around each monitored community.

172  
173 Most landscapes surrounding our sampled communities have only changed slightly over the  
174 monitoring periods (see Figure R1 above). Regarding the index of agricultural intensification, we now  
175 consider the mean agricultural spending over the entire monitored period of each taxa respectively.

176  
177  
178 **#8. With the landscape data, the authors measure habitat conversion around focal sites and**  
179 **make implicit assumption about habitat conversion leading to habitat degradation. They should**  
180 **make those assumptions explicit, or confine inferences to the effects of the surrounding habitat**  
181 **conversion (which is related to habitat loss, connectivity, and other landscape features in**

182 addition to potential degradation of habitat that remains). Specifically, they assume  
183 urbanization is a detriment to semi-natural and agricultural areas while agricultural  
184 intensification is a detriment to woodland and semi-natural areas. Why wouldn't agricultural  
185 intensification, like urbanization, also be a detriment to agricultural areas? While at least some  
186 details are provided about the buffer habitats, I could not find details about the focal habitats.  
187 For example, for the bat samples, how many local pops were in each of the different land cover  
188 types? For bird samples, how many BBS plots were distributed in which habitat types? Ditto for  
189 butterfly garden counts.

191 We believe that there is a misunderstanding here. We do not measure habitat conversion but landscape  
192 composition. The two landscape gradients extracted from the principal component analysis (PCA)  
193 indicate that in the set of sites we studied, we have sites with various level of urbanization (first axis of  
194 the PCA) and the more urban area around a site there is, the less semi natural habitat and agricultural  
195 area there are. Independently of this gradient, our monitored sites vary in the amount of intensive  
196 agricultural land surrounding them (second axis of the PCA), from sites surrounded by intensive  
197 agricultural lands to sites surrounded by woodland and/or open semi-natural areas.

198 To clarify this point, we modified the description of the analysis in the main text line 63 to 70 (see  
199 below) and integrated the supplementary figure 1 in the main text with expended legend. We also now  
200 avoid using the terms "agricultural intensification" and "urbanization" and rather refer to "agricultural  
201 intensity gradient" and "urban gradient".

203 "We analyzed the landscape surrounding these communities using a principal component analysis and  
204 distinguished two independent habitat degradation gradients. First an urbanization gradient opposing  
205 sites surrounded by urban and sealed soil areas to sites surrounded by semi-natural and agricultural  
206 landscape. Second, an agricultural intensification gradient, opposing sites within landscapes  
207 dominated by cropland areas with high agricultural inputs to sites surrounded by heterogenous  
208 landscape including higher proportion of, woodland areas and semi-natural open areas (Fig. 2, see  
209 Methods)."

211 Regarding the focal habitat, see our response to comment # 4 reviewer # 1 and response to comment #  
212 3 reviewer # 3

215 **#10. For a paper examining mechanistic aspects of community dynamics, the authors are vague  
216 on natural histories of the taxon studied, and those natural histories are necessary to make sense  
217 of their results. How would it affect the results if some butterfly species had metapopulation  
218 dynamics in which "stability" manifests as localized boom-bust dynamics followed by re-  
219 colonization events?**

221 See our response to comment # 2 reviewer # 1 regarding the natural history.

223 The use of nationwide dataset on natural community, necessarily implying correlative approaches,  
224 prevents us to test for all possible mechanisms. Such dataset are necessarily noisy but still can reveal  
225 general patterns that can be related to what is expected from theory or can generalized results found in  
226 smaller but more controlled systems.

228 We agree that metapopulation dynamics might be one of the mechanisms underlying the dynamic of  
229 some species included in the datasets. However, we do not think that this should question our results.  
230 If the population of such species exhibit boom-bust dynamics at the monitored sites, they will increase  
231 the community variability through their high population variability. However, this should not prevent  
232 them to also be affected by the quality landscape surrounding the sampling site.

234 **#11. With regard to the citizen science projects, the three selected have standardized protocols  
235 and long-term data which are two features that favor data quality. As the authors point out, the  
236 bat survey is biased for roads with low traffic. I could not find information about the focal**

237 **habitat for the 152 local bat communities studied. The project requires quite a bit of work from**  
238 **volunteers which leads me to strongly suspect the competent volunteers remain and provide**  
239 **reliable and trustworthy data.**

240  
241 Regarding the focal habitat, see our response to comment # 4 reviewer # 1 and response to comment #  
242 3 reviewer # 3

243  
244 There is indeed some turnover of volunteers in these schemes, some of them participating for one or  
245 two years only. However, we selected only sites which were monitored by the same volunteers for a  
246 longer period, finding a compromise between the number of available sites and the number of years of  
247 monitoring. This selection imply that we selected the most motivated and skilled volunteers which  
248 provide data with the highest quality.

249  
250 **#12. The Birding Bird Survey is 2x2km2 plots randomly selected in which 10 survey points to**  
251 **cover range of habitat types within a given plot (but again, not clear details about the**  
252 **proportions of these habitats in the final sample). The BBS involves sampling twice per year on**  
253 **exactly the same dates per site per year, during fall and spring migration which means that these**  
254 **data do not represent the local community of birds, but migrants passing through. Again I**  
255 **suspect this intense project attracts highly competent birders capable of providing reliable and**  
256 **trustworthy data. However, the timing of avian migration peaks have been found to change in**  
257 **response to climate change in some areas, and with a large component of abundance being**  
258 **migrants, it raises question about whether trends in abundance reflect local changes or changes**  
259 **in timing of migration for these 269 bird communities – which they call “local bird**  
260 **communities” but not clear to me whether they excluded migrants.**

261  
262 Contrary to the reviewer remark, the French BBS protocol allows for a few days flexibility for  
263 surveying dates: each year, the surveys are done at approximately the same dates to allow for observer  
264 availability (most observers are volunteers who participate on their spare time) and weather  
265 conditions.

266  
267 Most of the data collected during the surveys represent local breeders (either from sedentary or  
268 migratory species), since the 5 minutes point counts done in the early morning record mostly singing  
269 birds, i.e. territorial males on their breeding grounds. Consequently, there is a low probability that the  
270 counts include migrants passing through.

271  
272 The French BBS does not include a survey date during fall migration.

273  
274 We re-run the analysis with the Dataset 1 after removing the transaharian migrants, with the Shannon  
275 index and the weighted MPD. Our results show the robustness of our analysis (see comparison in the  
276 two tables below).

277  
278 Table: Strength of the different paths by which diversity and habitat degradation affect the stability of  
279 local communities of birds comparing the results of the analyses now presented in the main text with  
280 similar analyses but without transaharian migrants.

| Effects on community stability    | Results from main analysis | Results excluding transaharian migrants |
|-----------------------------------|----------------------------|-----------------------------------------|
| <b>Diversity effects</b>          |                            |                                         |
| Total effects                     | 0.264                      | 0.218                                   |
| Species diversity effects         | 0.264                      | 0.218                                   |
| Phylogenetic diversity effects    | NA                         | NA                                      |
| Effects via population stability  | NA                         | NA                                      |
| Effects via population asynchrony | 0.264                      | 0.218                                   |

| <b>Habitat degradation effects</b>   |        |        |
|--------------------------------------|--------|--------|
| Total effects                        | -0.291 | -0.226 |
| Urbanisation effects                 | -0.043 | 0.036  |
| Agricultural intensification effects | -0.248 | -0.262 |
| Effects via diversity                | -0.092 | -0.087 |
| Effects via population stability     | -0.198 | -0.139 |
| Effects via population asynchrony    | NA     | NA     |

281  
282  
283  
284  
285  
286

Table: Standardized coefficients from the Structural Equation Models on the stability of bird communities for the analyses now presented in the main text and similar analyses but without transaharian migrants.. Est. stands for estimates. SE for standard errors. P-val. for P-value.

| <b>Response</b>        | <b>Predictor</b>                | <b>Results from main analysis</b> |               |              | <b>Results excluding transaharian migrants</b> |              |              |
|------------------------|---------------------------------|-----------------------------------|---------------|--------------|------------------------------------------------|--------------|--------------|
|                        |                                 | <b>Est,</b>                       | <b>SE</b>     | <b>P-val</b> | <b>Est,</b>                                    | <b>SE</b>    | <b>P-val</b> |
| Species diversity      | Agricultural intensity gradient | <b>-0.1867</b>                    | <b>0.0625</b> | <b>0.003</b> | <b>-0.238</b>                                  | <b>0.063</b> | <b>0.000</b> |
| Species diversity      | Urban gradient                  | <b>-0.163</b>                     | <b>0.0585</b> | <b>0.006</b> | <b>-0.162</b>                                  | <b>0.061</b> | <b>0.008</b> |
| Phylogenetic diversity | Agricultural intensity gradient | <b>0.1779</b>                     | <b>0.0659</b> | <b>0.007</b> | <b>0.266</b>                                   | <b>0.064</b> | <b>0.000</b> |
| Phylogenetic diversity | Urban gradient                  | -0.0164                           | 0.0644        | 0.799        | 0.033                                          | 0.061        | 0.594        |
| Population stability   | Agricultural intensity gradient | <b>-0.3971</b>                    | <b>0.0646</b> | <b>0</b>     | <b>-0.391</b>                                  | <b>0.065</b> | <b>0.000</b> |
| Population stability   | Urban gradient                  | 0.0808                            | 0.06          | 0.179        | <b>0.132</b>                                   | <b>0.058</b> | <b>0.024</b> |
| Population stability   | Phylogenetic diversity          | 0.0409                            | 0.0555        | 0.462        | 0.058                                          | 0.058        | 0.323        |
| Population stability   | Species diversity               | -0.0167                           | 0.0617        | 0.786        | 0.073                                          | 0.059        | 0.212        |
| Population asynchrony  | Agricultural intensity gradient | 0.0167                            | 0.0607        | 0.784        | -0.015                                         | 0.065        | 0.819        |
| Population asynchrony  | Urban gradient                  | 0.0503                            | 0.0595        | 0.399        | 0.018                                          | 0.060        | 0.761        |
| Population asynchrony  | Phylogenetic diversity          | 0.0305                            | 0.0593        | 0.607        | 0.069                                          | 0.063        | 0.276        |
| Population asynchrony  | Species diversity               | <b>0.3663</b>                     | <b>0.0602</b> | <b>0</b>     | <b>0.317</b>                                   | <b>0.062</b> | <b>0.000</b> |
| Community stability    | Population asynchrony           | <b>0.7216</b>                     |               |              | <b>0.689</b>                                   |              |              |
| Community stability    | Population stability            | <b>0.4996</b>                     |               |              | <b>0.538</b>                                   |              |              |

287  
288  
289  
290  
291  
292  
293  
294  
295  
296  
297  
298  
299  
300  
301  
302  
303  
304

**The Butterfly data come from “gardens” which are residential habitat. The authors are appropriately conservative in restricting the butterfly/month species because identification by volunteers for some is difficult.**

We thank you for your positive comment.

**Reviewer #2:**

**The major claims of this paper is that human land use and species diversity have similar effects on the destabilization of animal communities. The relationship between human impacts on diversity and community stability has been a topic of study for decades in ecology. As such, this paper is on an important topic. However, what the authors present is not groundbreaking. They do look at stability and diversity in a couple of ways, but there is no mechanism.**

The use of nationwide dataset on natural community, necessarily implying correlative approaches, prevents us to test for all possible mechanisms. Such dataset are necessarily noisy but still can reveal

305 general patterns that can be related to what is expected from theory or can generalized results found in  
306 smaller but more controlled systems.

307  
308 We disagree with the reviewer regarding the lack of mechanisms. As presented in our study, there are  
309 two pathways by which community stability can be affected, either by a change in the stability of the  
310 species themselves or by a change in the synchrony of their fluctuation through time. These two  
311 pathways can involve different mechanisms driving community stability and, actually, our analyses  
312 show that if habitat degradation and diversity loss both decrease community stability, they do it via  
313 different pathways. While habitat degradation mainly decrease the stability of the species within  
314 communities, diversity loss mainly decrease the asynchrony among species within communities. To  
315 our knowledge, these results were not reported in the literature before; they change the classical view  
316 of perturbation decreasing diversity, which in turn decrease stability. Further, our analysis suggests  
317 that the mechanism driving asynchrony is related to response diversity among species since it correlate  
318 to the phylogenetic diversity of the community. Finally, our results indicates that the type of landscape  
319 degradation that affects the most the stability of the populations differ among taxa and we propose  
320 related mechanisms in our discussion such as, depending on the taxa, lower resources availability or  
321 higher variability in resource availability (see lines 159-173 in the main text), thereby paving the way  
322 to more detailed studies.

323  
324 **#1. It is a nice empirical study, but I do not know what more it provides than, for example,**  
325 **Blüthgen, Nico, et al. "Land use imperils plant and animal community stability through changes**  
326 **in asynchrony rather than diversity." *Nature Communications* 7 (2016): 10697.**

327  
328 We thanks the reviewer for his or her positive comment. The main difference between our study and  
329 the one of Blüthgen et al. relies on the model of path analysis used that differ both in terms of the  
330 variables included and in terms of the links among them. This has profound implications in the results  
331 and related interpretation.

332 Firstly, Blüthgen et al. do not include population stability in their path analysis model despite its  
333 known role in determining community stability (Thibaut & Connolly 2013). Consequently, there is no  
334 results in Blütghen et al. regarding the effect of landscape degradation on population stability whereas  
335 our results identify this pathway as dominant for the three taxonomic group studied.

336 Secondly, the path model used by Blüthgen et al. tests three pathways or mechanisms by which land  
337 use intensity can affect community stability: the first one through a change in diversity, the second  
338 through a change in asynchrony and the third one through a change in abundance. Looking at  
339 Blüthgen supplementary figures 2 and 3, their results clearly indicate that asynchrony has the strongest  
340 effect of community stability compared to diversity or abundance, for all taxonomic groups studied  
341 and for both woodland and grassland. However, they found that land-use intensity significantly affects  
342 species asynchrony only for birds in forests and for plants in grasslands and the effect is negative only  
343 for birds; so they found that land use intensity affects community stability through a change in  
344 asynchrony in only two cases out of eight, one time negatively and one time positively. They also  
345 found that land use intensity affects community stability through a change in abundance in four cases  
346 out of eight (three times negatively and one time positively) and through a change in diversity in two  
347 cases out of eight (both times negatively). Therefore, contrary to their claim, their result do not show a  
348 consistent effect of land use intensity on community stability through a decrease of asynchrony. The  
349 fact that they did not find such an effect is also coherent with our results as we show that the effect of  
350 habitat degradation is not mediated by a change in asynchrony but a change in population stability, a  
351 variable not included in their path analysis models.

352 Thirdly, the analytical decomposition of the community stability into a species stability and  
353 asynchrony components (Thibaut & Connolly 2013) supports the four storeys architecture of our path  
354 analysis model as it indicates that asynchrony cannot be positioned at the same level as diversity, as  
355 done in Blüthgen et al. As a consequence of this, the architecture of our path analysis model further  
356 allows testing for the effect of habitat degradation both directly through changes in the two  
357 components of community stability and indirectly through changes in diversity. This is another major  
358 difference between our study and that of Blüthgen, as it allows to properly test whether the effects of

359 habitat degradation are mediated by changes in diversity or directly affect the components of  
360 community stability.

361 Finally, unlike Blüthgen's study, our analysis also includes phylogenetic diversity as a possible  
362 determinant of community stability, with result supporting the hypothesis that species response  
363 diversity to environmental variations is a key mechanism for population asynchrony in communities.

364

365

366 Refererence:

367 Thibaut, L. M. & Connolly, S. R. Understanding diversity–stability relationships: towards a unified  
368 model of portfolio effects. *Ecology Letters* **16**, 140–150 (2013)

369

370

371 **#2. The authors performed a regression on of weighted MPD on SR. Why was a phylogenetic**  
372 **metric that includes species abundances chosen? What is the relationship between unweighted**  
373 **MPD and community stability? Including abundances into an explanatory variable introduces**  
374 **statistical independence biases (i.e., including an independent variable that derived from the**  
375 **dependent variable). The residuals (see figure S15) may certainly help reduce independence**  
376 **biases but then one must assume that the regressions that produced the MPD residuals well fit**  
377 **the data. If the authors want to use the weighted metric, then instead of richness they should use**  
378 **a diversity metric instead. Regardless of choice, the authors must include the unweighted MPD**  
379 **metric as this is more analogous to the SR metric and is the metric most often used. Note that**  
380 **the expectation of unweighted MPD is not dependent on SR (the actual values are but the**  
381 **expectation is not), thus it is less likely that the authors would need to.**

382

383 We agree with the reviewer that using analogous diversity metrics that either both include species  
384 abundances or not is preferable. We thus rerun our analysis the two ways, either with the Shannon  
385 diversity and the weighted MPD or with the species richness (or Chao index) and the MPD. Both  
386 analysis gave qualitatively similar results (see supplementary figures 15-17).

387 We think that accounting for species abundance seems to make more sense. Indeed phylogenetic  
388 diversity is expected to foster community stability through increased asynchrony because unrelated  
389 species are expected to respond to perturbation in different ways because of their trait differences. This  
390 mechanism is expected to be stronger when the abundance of those species are even. Similarly, for  
391 species diversity, in uneven communities, a smaller number of species will drive the stability of the  
392 community because of the mean-variance relationship.

393 We choose to present the analysis with weighted metrics in the main text and to provide the analysis  
394 with unweighted metrics in the supplementary material but this can change if the reviewer or the editor  
395 prefer the other way.

396

397 **#3. How were the species in the analyses chosen? The authors indicate they only used common**  
398 **species, but where is the cutoff and does this cutoff influence the metrics of community stability?**  
399 **Are the more diverse communities more likely to have rare species that were removed from the**  
400 **analyses and does including these rare species influence the relationships?**

401

402 Regarding the bat dataset, we did not use cut-off and all contacted species were included.

403

404 Regarding the butterfly dataset, we did not use cut-off neither. The species list used was defined by  
405 the monitoring program protocol that focuses on 14 species that are easily identifiable and known to  
406 be common from expert knowledge. As shown in our response to comment # 2 of reviewer # 3, the  
407 stability metric calculated with these 14 species was highly correlated with the one calculated with the  
408 extra species and species groups. Note that we cannot perform our analysis with species groups as it  
409 precludes calculating species richness or phylogenetic diversity. Further, including the extra species is  
410 problematic as monitoring these extra species is not mandatory and we cannot know if volunteers do  
411 not report these species because they do not observe them or because they do not use the list of extra  
412 species, which would make our dataset not homogeneous.

413

414 Regarding the bird dataset, the 75 species are indeed among the most common ones, excluding species  
 415 often seen while transiting. This selection of species was performed by the coordinator of the  
 416 monitoring program to insure high quality data and to allow producing reliable population trends  
 417 (Devictor et al. 2012; note in this publication that 65 species were found to have sufficient data and  
 418 since then, data on 10 additional species has been added to this list).  
 419 The reviewer is right about the fact that more rare species were found in the communities with the  
 420 more species in the dataset with 75 species (see below).  
 421

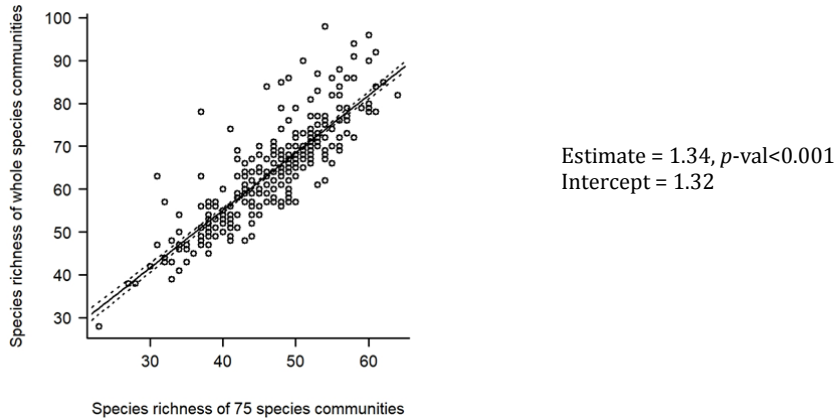

422  
 423 Figure R2: correlation between the bird species richness when including only the 75 most common  
 424 species and the full species richness (all species included).  
 425

426  
 427 To assess the impact of excluding rare species, we re-run the analysis with the full set of species,  
 428 including 234 bird species. The results were qualitatively similar to the ones obtained with the 75 most  
 429 common species (see comparison in the two tables below).  
 430

431 Table: Strength of the different paths by which diversity and habitat degradation affect the stability of  
 432 local communities of birds comparing the results of the analyses presented in the main text for  
 433 common bird species with similar analyses but including rare bird species.  
 434

| Effects on community stability       | Results from main analysis with 75 common bird species | Results including rare bird species (total = 234 species) |
|--------------------------------------|--------------------------------------------------------|-----------------------------------------------------------|
| <b>Diversity effects</b>             |                                                        |                                                           |
| Total effects                        | 0.264                                                  | 0.175                                                     |
| Species diversity effects            | 0.264                                                  | 0.175                                                     |
| Phylogenetic diversity effects       | NA                                                     | NA                                                        |
| Effects via population stability     | NA                                                     | -0.076                                                    |
| Effects via population asynchrony    | 0.264                                                  | 0.252                                                     |
| <b>Habitat degradation effects</b>   |                                                        |                                                           |
| Total effects                        | -0.291                                                 | -0.24                                                     |
| Urbanisation effects                 | -0.043                                                 | -0.027                                                    |
| Agricultural intensification effects | -0.248                                                 | -0.212                                                    |
| Effects via diversity                | -0.092                                                 | -0.027                                                    |
| Effects via population stability     | -0.198                                                 | -0.212                                                    |
| Effects via population asynchrony    | NA                                                     | NA                                                        |

435  
 436

437 Table: Standardized coefficients from the Structural Equation Models on the stability of bird  
 438 communities for the analyses presented in the main text and similar analyses but with including rare  
 439 bird species. Est. stands for estimates. SE for standard errors. P-val. for P-value.  
 440

| Response               | Predictor                       | Results from main analysis with common bird species |               |              | Results including rare bird species |              |              |
|------------------------|---------------------------------|-----------------------------------------------------|---------------|--------------|-------------------------------------|--------------|--------------|
|                        |                                 | Est.                                                | SE            | P-val        | Est.                                | SE           | P-val        |
| Species diversity      | Agricultural intensity gradient | <b>-0.1867</b>                                      | <b>0.0625</b> | <b>0.003</b> | -0.1                                | 0.064        | 0.09         |
| Species diversity      | Urban gradient                  | <b>-0.163</b>                                       | <b>0.0585</b> | <b>0.006</b> | <b>-0.2</b>                         | <b>0.062</b> | <b>0.012</b> |
| Phylogenetic diversity | Agricultural intensity gradient | <b>0.1779</b>                                       | <b>0.0659</b> | <b>0.007</b> | <b>0.3</b>                          | <b>0.062</b> | <b>0</b>     |
| Phylogenetic diversity | Urban gradient                  | -0.0164                                             | 0.0644        | 0.799        | 0.07                                | 0.059        | 0.238        |
| Population stability   | Agricultural intensity gradient | <b>-0.3971</b>                                      | <b>0.0646</b> | <b>0</b>     | <b>-0.4</b>                         | <b>0.065</b> | <b>0</b>     |
| Population stability   | Urban gradient                  | 0.0808                                              | 0.06          | 0.179        | 0.05                                | 0.059        | 0.414        |
| Population stability   | Phylogenetic diversity          | 0.0409                                              | 0.0555        | 0.462        | -0.1                                | 0.06         | 0.387        |
| Population stability   | Species diversity               | -0.0167                                             | 0.0617        | 0.786        | <b>-0.1</b>                         | <b>0.057</b> | <b>0.014</b> |
| Population asynchrony  | Agricultural intensity gradient | 0.0167                                              | 0.0607        | 0.784        | -0                                  | 0.063        | 0.684        |
| Population asynchrony  | Urban gradient                  | 0.0503                                              | 0.0595        | 0.399        | 0.04                                | 0.06         | 0.514        |
| Population asynchrony  | Phylogenetic diversity          | 0.0305                                              | 0.0593        | 0.607        | -0                                  | 0.063        | 0.943        |
| Population asynchrony  | Species diversity               | <b>0.3663</b>                                       | <b>0.0602</b> | <b>0</b>     | <b>0.35</b>                         | <b>0.059</b> | <b>0</b>     |
| Community stability    | Population asynchrony           | <b>0.7216</b>                                       |               |              | <b>0.71</b>                         |              |              |
| Community stability    | Population stability            | <b>0.4996</b>                                       |               |              | <b>0.54</b>                         |              |              |

441  
 442  
 443  
 444  
 445  
 446  
 447

Reference:

(Jiguet, F., Devictor, V., Julliard, R., & Couvet, D. (2012). French citizens monitoring ordinary birds provide tools for conservation and ecological sciences. *Acta Oecologica*, 44, 58-66.)

448 **#4. Statistically, as SR decreases CV will increase and thus, SR should have a negative**  
 449 **relationship with community stability as measured by 1/CV. How then do the authors account**  
 450 **for the statistical artifact of lower SR along urbanization and agriculture gradients? Figure 2**  
 451 **does not deal with this issue and the SEM may not as well. I say may not because SEMs are still**  
 452 **prone to collinearity issues like any standard regression, but the effect of collinearity must be**  
 453 **assessed for any model (it does not seem as if the authors did this check). An often used method**  
 454 **is to devise a randomization and thus model (and plot) standardized effect sizes.**  
 455

456 To check for the potential multi-collinearity in our models, we performed variance inflation factor  
 457 analysis for the models presented in the main text, i.e. the Dataset 1, the spatial scale with the best AIC  
 458 and for both Shannon index / weighted MPD and species richness / non-weighted MPD. All our  
 459 variance inflation factor are less than 1.5, suggesting the absence of multi-collinearity in our models.  
 460

461 Table. Variance inflation factors for each variable / model / taxa.

462 Mod 1: Shannon index (or species richness) ~ urban gradient + agricultural gradient  
 463 Mod 2: Weighted MPD (or Non-weighted MPD) ~ urban gradient + agricultural gradient  
 464 Mod 3: Weighted mean population stability ~ urban gradient + agricultural gradient+ Shannon index  
 465 (or species richness) + Weighted MPD (or Non-weighted MPD)  
 466 Mod 4: Asynchrony ~ urban gradient + agricultural gradient+ Shannon index (or species richness) +  
 467 Weighted MPD (or Non-weighted MPD)

| Shannon index + weighted MPD |       |             | Species richness + non-weighted MPD |       |             |
|------------------------------|-------|-------------|-------------------------------------|-------|-------------|
| Bats                         | Birds | Butterflies | Bats                                | Birds | Butterflies |



|       |                                  |      |      |      |       |      |      |
|-------|----------------------------------|------|------|------|-------|------|------|
|       | Urban gradient                   | 1.09 | 1    | 1    | 1.09  | 1    | 1    |
| Mod 1 | Agricultural gradient            | 1.09 | 1    | 1    | 1.09  | 1    | 1    |
|       | Urban gradient                   | 1.09 | 1    | 1.01 | 1.09  | 1.01 | 1    |
| Mod 2 | Agricultural gradient            | 1.09 | 1    | 1.01 | 1.09  | 1.01 | 1    |
|       | Urban gradient                   | 1.29 | 1.04 | 1.22 | 1.25  | 1.06 | 1.27 |
|       | Agricultural gradient            | 1.44 | 1.09 | 1.17 | 1.43  | 1.17 | 1.06 |
|       | Shannon index / species richness | 1.16 | 1.09 | 1.22 | 1.11  | 1.03 | 1.26 |
| Mod 3 | Weighted MPD - Non-weighted MPD  | 1.25 | 1.01 | 1.17 | 1.31  | 1.18 | 1.07 |
|       | Urban gradient                   | 1.29 | 1.09 | 1.22 | 1.25  | 1.05 | 1.27 |
|       | Agricultural gradient            | 1.44 | 0.17 | 1.17 | 0.143 | 1.2  | 1.06 |
|       | Shannon index / species richness | 1.16 | 1.16 | 1.22 | 1.11  | 1.08 | 1.26 |
| Mod 4 | Weighted MPD - Non-weighted MPD  | 1.25 | 1.05 | 1.17 | 1.32  | 1.14 | 1.07 |

468

469

470

471

472

473

474

475

476

477

478

479

480

481

482

483

484

485

486

487

488

489

490

491

492

493

494

495

496

497

498

499

500

501

502

503

504

505

506

507

508

**#5. Comments on figures and tables: Table 1 is not a visually useful presentation of the results. Consider bar charts with errors so show the difference in magnitude. Figure 1: the magnitude of total abundance is so large that you cannot see how the individual species vary. Try plotting two y axes, log transform, or broken y axis. Figure 2: why are only some of the relationships plotted here? The x axis in c is difficult to see the bat data. Perhaps try plotting z scores of richness for each of the data sets.**

Although we agree that a table might not be the most efficient visually, we think that presenting those numbers with a graph might not be the most appropriate either. Table 1 summarizes at the path level the effects presented graphically in Figure 4. It allows comparing the various paths for the three studied taxa in, we think, a very efficient and concise way. Consequently, we prefer to stick to a table. However, we took this reviewer idea to present the results of the robustness analysis in the supplementary figures 15, 16 and 17.

For Figure 1, we log transformed y axes.

For Figure 2, which is now Figure 3 in the main text, we plotted all relationships and we plotted z scores of species diversity and phylogenetic diversity to improve readability.

**Reviewer #3:**

**This paper is using citizen science biodiversity monitoring data to assess how habitat degradation and urbanization influence the stability of ecological communities, and the relative roles of decreasing population stability and synchrony on community stability. I appreciate the innovative approach, but have some serious doubts both about the data used and regarding the interpretation of the results.**

**#1. The authors are using monitoring data on birds, bats and butterflies collected by citizen scientists to assess community stability over time. However, the time series for bats is quite short for this types of analyses. According to the authors (lines 290-291) the bat data consist of time series on only 4-6 years. This is very short in an ecological context, and is unlikely to include the full variability of bat communities. Hence, it is likely that they are under-estimating the community variability.**

Note that the objective of our study is to assess the impact of diversity loss and habitat degradation on the community stability and not to quantify the full variability of the studied communities. Since the length of the time series we used does not vary with the diversity of the studied communities nor with

509 any of the two landscape gradients, there is no reason to believe that the length of the time series could  
510 bias our results.

511 The reviewer does not either suggest that longer time series would affect differently richer  
512 communities or communities surrounded by intensive agricultural land, urban areas or more natural  
513 landscape, which would be a problem.

514  
515 Finally, we do not agree that the length of our time series are too short to assess community stability  
516 nor that they are particularly short regarding other studies on the same topic. The mean life expectancy  
517 averaged across species included in our analysis is 2.9 years for bats (see Table 1 for species level  
518 estimates and references), which is under our time series lengths. Hence, for each taxon, our time  
519 series are sufficient to capture community stability over several generations. Also note that compared  
520 to classical studies on diversity-stability relationship in plant communities, the ratio of the length of  
521 the time series on the mean annual life span of the organisms we used is rather high (see table 2 in  
522 Gross et al. 2014, average time series length = 6.5 years). For example in the well-known Cedar Creek  
523 biodiversity experiment, all plants are perennials (life span higher than 2 years) and the time series  
524 used were 10-year long (Tilman et al. 2006 in Nature), which conservatively leads a ratio similar to  
525 what we have for the bat dataset. Finally, our analysis clearly shows that our results are robust to the  
526 length of the time series used (see Tables S3-5 of our manuscript), and recent publications (Isbell et al.  
527 2015 in Nature and Hautier et al 2015 in Science) highlight that results on community stability are  
528 consistent between short-term – 3-4 years - and longer term studies.

529  
530

Table 1. Mean life expectancy in years of bat species included in our dataset

| Species                          | Average life span (years) |
|----------------------------------|---------------------------|
| <i>Nyctalus leisleri</i>         | 2.7                       |
| <i>Nyctalus noctula</i>          | 2.2                       |
| <i>Eptesicus serotinus</i>       | NA                        |
| <i>Pipistrellus pipistrellus</i> | 2.2                       |
| <i>Pipistrellus kuhlii</i>       | 2.2                       |
| <i>Pipistrellus nathusii</i>     | 2.9                       |
| <i>Barbastella barbastellus</i>  | 5.5                       |

531  
532

#### 533 References

534

535 Arthur L. & Lemaire M. 2009. Les Chauves-souris de France, Belgique, Luxembourg  
536 et Suisse. Biotope, Mèze (Collection Parthénopé); MNHN, Paris, 544p.

537

538 Gross, K., Cardinale, B. J., Fox, J. W., Gonzalez, A., Loreau, M., Wayne Polley, H., ... & van  
539 Ruijven, J. (2013). Species richness and the temporal stability of biomass production: a new  
540 analysis of recent biodiversity experiments. *The American Naturalist*, 183(1), 1-12.

541

542 Tilman, D., Reich, P. B., & Knops, J. M. (2006). Biodiversity and ecosystem stability in a  
543 decade-long grassland experiment. *Nature*, 441(7093), 629.

544

545 **#2. The butterfly data does not consists of surveys of the full community. Instead, citizen**  
546 **scientists are recording species on a “closed list of 28 common species or species groups” (line**  
547 **278), of which only 14 were used in the analyses. This is probably far from the full set of species**  
548 **encountered over a period of 7-11 years, even in urban environments. The authors state that**  
549 **“the temporal variability of the butterfly community restricted to these 14 species reflects that of**  
550 **the entire community” (lines 282-283). It is however unclear if they by “the entire community”**  
551 **here actually refer to the 28 common “species or species groups”, or if they actually refer to the**  
552 **full community. Since they probably only have data on the 28 species or species groups I assume**  
553 **that this is what they refer to. If so, I find it misleading to say that “the temporal variability of**  
554 **the butterfly community restricted to these 14 species reflects that of the entire community”.**

555 **And more importantly, since they do only sample a subset consisting of common species, I find it**  
556 **likely that they are under-estimating the community variability. For these reasons, there is a**  
557 **considerable risk that the authors are under-estimating the variability of both bat and butterfly**  
558 **communities, with unknown consequences for the main conclusions.**  
559

560 We agree that the use of “entire community” was misleading and we replaced it by “the community  
561 including the abundance of the species groups”.

562  
563 To investigate the potential consequences of not sampling the full community on the estimation of the  
564 community stability we used some extra-data. In addition to the 28 species and species groups, the  
565 volunteers can also use an additional list with three species groups and three species of Rhopalocera  
566 and six Heterocera species. However, the use of this extra list is not mandatory and actually few  
567 participant use it, although we don't know if it is because they don't use it or because they do not  
568 observe the corresponding butterflies. We recalculated the community variability with the 28 species  
569 and species groups as well as this extra list, and compared it to the variability we have with the dataset  
570 including only the 14 species. As shown in the figure below, we found a high correlation between  
571 these two datasets, similarly to what we found when comparing the 14 species dataset to the 28  
572 species and group of species dataset (result presented in the supplementary Fig. 9).  
573

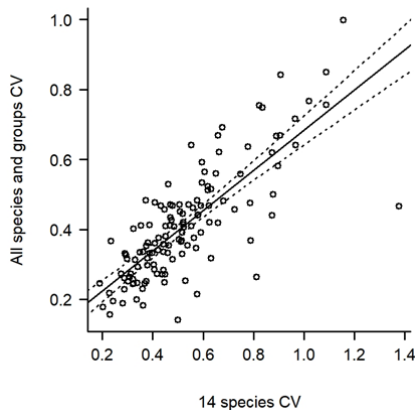

574  
575 Figure R3. Relationship between the coefficients of variation of the total abundance of the butterfly  
576 communities calculated with the 28 species and group of species plus the extra list and the butterfly  
577 communities restricted to the 14 species that could be identified with certainty (Estimate = 0.57, p-  
578 value < 0.001, intercept = 0.11). Regression line and its 95% confidence intervals are represented by  
579 solid and dotted lines.  
580

581 This high correlation between the three subsets is not surprising as rare species contribute less to the  
582 variability of the community as their abundance is low. Note that contrary to the expectation of the  
583 reviewer, we tend to overestimate community variability by restricting the data to the 14 species. But  
584 as explained in our response to comment # 1 of reviewer # 3, the objective of our study is not to  
585 provide the true value of community variability but to assess how variability is affected by community  
586 diversity and landscape quality.  
587

588 Since (i) we need species level identification to perform our analysis, (ii) we cannot be sure that all  
589 volunteers use the extra list and (iii) the community variability is highly correlated among the three  
590 datasets, we are confident that using the dataset on the 14 species does not bias the result of our  
591 analysis and insure that our dataset is homogeneous in term of sampling.  
592

593 Regarding the impact of including rare species on our results, please see our response to comment # 3  
594 of reviewer # 2.  
595

596 **#3. Butterflies were monitored in residential gardens. Yet most of the monitored species are**  
 597 **unlikely to actually breed in many of these gardens, but rather use than for foraging only. So, if**  
 598 **only a part of their habitat is monitored it is unclear what the inter-annual variability in**  
 599 **community composition actually means.**  
 600

601 All the 14 butterfly species studied forage in gardens but we agree that we do not know if they actually  
 602 breed in it. However, monitoring the abundance of species within a foraging site still provide  
 603 information on the dynamic of these species, even if the monitoring site does not encompass their full  
 604 habitat. If the population decline, less individuals will be seen foraging and if the population increases,  
 605 more individuals will be seen foraging. Such site-based approaches are common to study community  
 606 dynamic under natural condition (e.g. Blüthgen et al. 2015) and even inevitable since populations  
 607 from different species have different habitat definitions and sizes, not fully overlapping, making it  
 608 impossible to define a common area that would include the entire populations of all species composing  
 609 an ecological community.

611 **#4. Also, the monitored species include two migratory species (*Vanessa atalanta* and *V. cardui*),**  
 612 **of which at least *V. cardui* is unlikely to overwinter in France, and the population variability**  
 613 **depends mainly on conditions in North Africa and the Mediterranean region.**  
 614

615 We agree that the population variability of migratory species depend on conditions that we do not  
 616 account for in our analysis. However, the local conditions we analysed might still play a role by  
 617 affecting the survival of individuals. Further, if migratory species, which population variability are  
 618 driven by conditions outside our study area, were fully driving the dynamic of the studied  
 619 communities, we would expect that to blur the signal and not to find any effect of the landscape  
 620 characteristics surrounding our study sites. So including these migratory species is conservative  
 621 regarding the result we find.

622  
 623 However, to test the effect of these migratory species on our results, we re-run our analyses removing  
 624 *V. atalanta* and *V. cardui* (see below). The results obtained are qualitatively similar, highlighting the  
 625 same relationships between habitat degradation, community diversity and community stability.  
 626 Exclusion of these two migratory species mainly lead to the detection of stronger negative effects of  
 627 habitat degradation on butterfly community stability, suggesting that observed effects of landscape  
 628 characteristics might indeed be partly attenuated by the presence of migratory species.

629  
 630 Table: Strength of the different paths by which diversity and habitat degradation affect the stability of  
 631 local communities of butterflies comparing the results of the analyses presented in the main text with  
 632 similar analyses but excluding *Vanessa atalanta* and *V. cardui*.  
 633

| Effects on community stability       | Results from main analysis | Results excluding <i>V. atalanta</i> and <i>V. cardui</i> |
|--------------------------------------|----------------------------|-----------------------------------------------------------|
| <b>Diversity effects</b>             |                            |                                                           |
| Total effects                        | 0.487                      | 0.413                                                     |
| Species diversity effects            | 0.18                       | 0.26                                                      |
| Phylogenetic diversity effects       | 0.307                      | 0.153                                                     |
| Effects via population stability     | 0.143                      | NA                                                        |
| Effects via population asynchrony    | 0.344                      | 0.413                                                     |
| <b>Habitat degradation effects</b>   |                            |                                                           |
| Total effects                        | -0.134                     | -0.306                                                    |
| Urbanisation effects                 | -0.247                     | -0.254                                                    |
| Agricultural intensification effects | 0.112                      | -0.052                                                    |
| Effects via diversity                | 0.013                      | -0.105                                                    |
| Effects via population stability     | -0.26                      | -0.201                                                    |

|                                   |       |    |
|-----------------------------------|-------|----|
| Effects via population asynchrony | 0.112 | NA |
|-----------------------------------|-------|----|

634  
635  
636  
637  
638  
639  
640

Table: Standardized coefficients from the Structural Equation Models on the stability of butterfly communities for the analyses presented in the main text and similar analyses but with including rare *Vanessa atalanta* and *V. cardui*. Est. stands for estimates. SE for standard errors. P-val. for P-value.

| Response               | Predictor                       | Results from main analysis |              |              | Results excluding <i>V. atalanta</i> and <i>V. cardui</i> |              |              |
|------------------------|---------------------------------|----------------------------|--------------|--------------|-----------------------------------------------------------|--------------|--------------|
|                        |                                 | Est.                       | SE           | P-val        | Est.                                                      | SE           | P-val        |
| Species diversity      | Agricultural intensity gradient | -0,131                     | 0,082        | 0,111        | <b>-0.200</b>                                             | <b>0.081</b> | <b>0.015</b> |
| Species diversity      | Urban gradient                  | <b>-0,366</b>              | <b>0,082</b> | <b>0,000</b> | <b>-0.353</b>                                             | <b>0.081</b> | <b>0.000</b> |
| Phylogenetic diversity | Agricultural intensity gradient | -0,059                     | 0,064        | 0,358        | -0.150                                                    | 0.086        | 0.082        |
| Phylogenetic diversity | Urban gradient                  | <b>0,258</b>               | <b>0,061</b> | <b>0,000</b> | <b>0.253</b>                                              | <b>0.080</b> | <b>0.002</b> |
| Population stability   | Agricultural intensity gradient | 0,047                      | 0,083        | 0,575        | -0.024                                                    | 0.087        | 0.786        |
| Population stability   | Urban gradient                  | <b>-0,366</b>              | <b>0,089</b> | <b>0,000</b> | <b>-0.274</b>                                             | <b>0.094</b> | <b>0.004</b> |
| Population stability   | Phylogenetic diversity          | <b>0,202</b>               | <b>0,084</b> | <b>0,019</b> | 0.043                                                     | 0.089        | 0.631        |
| Population stability   | Species diversity               | 0,133                      | 0,087        | 0,131        | 0.147                                                     | 0.092        | 0.113        |
| Population asynchrony  | Agricultural intensity gradient | <b>0,176</b>               | <b>0,086</b> | <b>0,042</b> | 0.097                                                     | 0.083        | 0.246        |
| Population asynchrony  | Urban gradient                  | 0,102                      | 0,091        | 0,268        | 0.090                                                     | 0.089        | 0.316        |
| Population asynchrony  | Phylogenetic diversity          | <b>0,257</b>               | <b>0,087</b> | <b>0,004</b> | <b>0.242</b>                                              | <b>0.085</b> | <b>0.005</b> |
| Population asynchrony  | Species diversity               | <b>0,283</b>               | <b>0,090</b> | <b>0,002</b> | <b>0.411</b>                                              | <b>0.088</b> | <b>0.000</b> |
| Community stability    | Population asynchrony           | <b>0,637</b>               |              |              | <b>0.632</b>                                              |              |              |
| Community stability    | Population stability            | <b>0,710</b>               |              |              | <b>0.734</b>                                              |              |              |

641  
642  
643  
644  
645  
646  
647  
648  
649  
650  
651  
652  
653  
654  
655  
656  
657  
658  
659  
660  
661  
662  
663  
664  
665

**#5. In the abstract, the authors state that both population synchrony and population stability have effects on community stability, but through different drivers, i.e. are important, but that diversity loss is mainly affecting synchrony and habitat degradation mainly decreases population stability. Yet, in the main text the authors mainly discuss the effects of habitat degradation on stability, and very little about diversity and synchrony. This inconsistency needs to be resolved.**

We thanks the reviewer for this remark. We expanded our discussion of the relationships linking diversity to community stability lines 130-150:

“This extends classical results found for experimental plant communities<sup>4,5</sup> to animal taxa with very different natural history and thereby suggests that the positive biodiversity-stability relationship found for primary production applies to other functions and services provided by animal communities. Our results also bring new support to the phylogenetic insurance hypothesis<sup>20</sup>, with a positive effect of phylogenetic diversity on population asynchrony found for bat and butterfly communities. This suggests that for these taxa, related species tend to share the traits involved in their response to environmental variations and perturbations and that we can use phylogeny as a proxy to assess the dynamical response of their populations to such environmental variations and perturbations.”

**#6. The different environmental drivers are estimated at different spatial scales. Landscape variables are assessed within radii of 250, 500 and 1000 m for bird and butterflies and in squares**

666 of 2-3 km for birds. In contrast, agricultural intensity variables are assessed with administrative  
667 regions (of unclear size, but probably much larger than the areas for which the landscape  
668 variables area assessed). This means that it is problematic to conclude that “while butterfly  
669 community stability is mainly impacted by urbanization, bird and bat communities are mostly  
670 destabilized by agricultural intensification...”. In reality, it might instead be that butterfly  
671 communities are impacted by (any) drivers at smaller spatial scales while bird and bat  
672 communities are impacted by (any) drivers at larger spatial scales. Also, the radii of 250-1000 m  
673 seems quite small for butterflies an especially for bats, which are flying over rather large.  
674

675 We think that there is a misunderstanding regarding the interpretation of our analysis of the  
676 environmental drivers, this probably due to a lack of explanation. While we assessed the composition  
677 of the landscape surrounding our study sites with buffers of different radii, we also characterised the  
678 intensity of the agricultural practices using an index available at the regional level (of average size of  
679 29000 km<sup>2</sup>). We calculated this last index as the amount of spending in agricultural input (fertilizers,  
680 pesticides, biocides) divided by the agricultural area of the administrative region. Although the spatial  
681 resolution of this index is not very high (but data with higher resolution are not available), it gives  
682 information about the average intensity of agricultural practices within the region which is still  
683 meaningful for France as some regions have clearly more intensive agricultural practices than others.  
684

685 This variable of intensity of agricultural practices, as well as the landscape composition (proportion of  
686 the different land-uses within the buffer) were included in the principal component analysis (PCA) for  
687 all buffer radii. Therefore, this agricultural intensity variable allows differentiating sites with the same  
688 landscape composition (proportion of the different land-uses within the buffer) but in different  
689 administrative region. The site in the region using more agricultural input would then be position  
690 further away along the PCA axis and would therefore be considered as having a surrounding landscape  
691 with more intensive agriculture.  
692

693 The two landscape gradients extracted from the principal component analysis (PCA) indicate that in  
694 the set of sites we studied, we have sites with various level of urbanization (first axis of the PCA) and  
695 this for all radii. Independently of this gradient, our monitored sites vary in the amount of intensive  
696 crop land surrounding them (second axis of the PCA), and this for all radii too (see figure 2). The best  
697 radius for each taxa is then selected based on AIC criteria. Therefore, in our analysis, there is no  
698 possible confusion between the scale at which the landscape composition affects the community  
699 dynamic and the nature of the landscape gradient that affects the community dynamic. In other words,  
700 even if agricultural inputs are averaged at the French administrative region, it does not mean that this  
701 variable reflect an effect on community variability at the regional scale, but it informs on the amount  
702 of agricultural inputs that the cropland around the site and quantified within our buffers received.  
703

704 To clarify these points we expended the explanation of the method (lines 425-466), modified the main  
705 text lines 63 to 70 and integrated the supplementary figure 1 in the main text with expended legend.  
706

707 Regarding the radii used for bats and butterflies, we choose them based on the literature. Flick et al.  
708 (2012) and Krauss et al. (2003), showed that the spatial extent at which landscape has the strongest  
709 effects on butterflies richness and abundance was between 250m. This relative small spatial scale is  
710 correlated with the average daily movement distance of butterflies, between 200 and 600. Regarding  
711 bats, we followed Azam et al., (2016) who studied the impact of landscape on bats with the same data  
712 as us, and used buffers of 200m, 500m, 700m and 1000m radii.  
713

714 Flick, T., Feagan, S. & Fahrig, L. Effects of landscape structure on butterfly species richness and  
715 abundance in agricultural landscapes in eastern Ontario, Canada. *Agriculture, Ecosystems and*  
716 *Environment* **156**, 123–133 (2012).  
717

718 Krauss, J., Steffan-Dewenter, I., Tscharncke, T., 2003. How does landscape context contribute to  
719 effects of habitat fragmentation on diversity and population density in butterflies? *J. Biogeogr.* 30,  
720 889–900.

721  
722  
723  
724  
725  
726  
727  
728  
729  
730  
731  
732  
733  
734  
735  
736  
737  
738  
739  
740  
741  
742  
743  
744  
745  
746  
747  
748  
749

Azam, C., Le Viol, I., Julien, J.-F., Bas, Y. & Kerbiriou, C. Disentangling the relative effect of light pollution, impervious surfaces and intensive agriculture on bat activity with a national-scale monitoring program. *Landscape Ecology* **31**, 2471–2483 (2016).

**Minor comments:**

**#7. I would like to see something about methods or the type of data used in the Abstract.**

We added the following sentence:

“Here we analyse the relationships among landscape composition, biodiversity and community stability looking at time series of three types of communities, i.e. bats, birds and butterflies, monitored over the years by citizen science programs..”

**#8. Lines 285-286: “...gardens that had been monitored in July...” Does this meant that only data from July was included in the analyses? But several of the butterfly species are active mainly during other parts of the year??**

We restricted butterfly data to July to get the highest number of followed sites with the same months of observations. This criterion allowed us to combine a good amount of data without heterogeneity in the data due to variations in butterfly species abundance among months between species with different phenologies. Moreover, the 14 species used in this study do have flying adults during July.

**#9. Line 377: Why did you use Corine Land cover data from 2006, and not more recent data (which I believe should be available).**

See our response to comment # 3 reviewer 1, we have now updated our landscape analyses to include more recent data as well.

Reviewers' comments:

Reviewer #1 (Remarks to the Author):

In this revision, the authors addressed my comments and concerns. I appreciate this paper looking at the mechanisms by which landscape changes affect animal communities.

Reviewer #2 (Remarks to the Author):

The authors have presented a well written and analyzed study on what determines community instability. The authors well addressed my previous comments.

Reviewer #3 (Remarks to the Author):

The revision has significantly improved the quality of the manuscript, but in my view there are still some outstanding issues.

I maintain that I think that the time series is short for analysing community stability over time. Invertebrates such as butterflies are known to fluctuate at least an order of magnitude in population size between years, and this also affects community dynamics. The argument that other studies also have used short time series does not solve this issue.

My previous comment that only a part of the habitat was sampled (for butterflies) is also not fully resolved. The authors argue that population declines should be reflected in gardens even if butterflies only forage (and not reproduce) there. But the point is that the extent to which butterflies use gardens for foraging might differ between years, depending on e.g. weather. In a dry year, an irrigated garden might be used to a much higher extent than natural habitats, but this might not be true in another year.



**After careful consideration, my colleagues and I agreed that the two outstanding concerns raised by Reviewer 3 on the study duration and the representativeness of the habitat sampling for butterflies have been partly addressed already. In particular, we are inclined to agree that the effects of “boom-bust” dynamics of single species should be dampened in your community-level analysis, as you argue in the response letter. However, it is important that this point is more clearly expressed in the main text, along with other caveats on potential issues regarding 1) the duration (for all taxa), and 2) potential biases of the sampling scheme (especially for the butterflies).**

To clarify the limitations of our study, we added a paragraph lines 174 to 190 in the "limit and conclusion" section part, discussing the impact of the time series duration, in particular in relation to the estimation of population and community variability, and the potential biases related to the butterfly sampling scheme:

**“Limits and conclusion**

Here we measured community stability at a relatively short-time scale (up to 6, 17 and 11 years for respectively bat, bird and butterfly communities), reflecting the time scale used in most studies on the relationship between diversity and community stability<sup>6</sup>. However, population and community temporal variability are known to increase with the considered time scale<sup>40-42</sup> and as such, our estimates of temporal variability might underestimate the full variability of the studied communities. While this should not affect the effects of landscape composition we found, and indeed our results are robust when compared with analyses on two subsets of our datasets with different time series durations (see Methods and Supplementary Fig. 7-9), longer time series would be required to estimate the full variability of the studied communities. Another limitation of our study is that we assessed habitat degradation at the landscape scale and did not account for local conditions, such as management practices, that could also affect community variability. For example, butterfly data were collected in private gardens with different management strategies that are known to affect the attractiveness for butterflies<sup>43</sup>. Accounting for such management practices as well as other local scale characteristics such as habitat heterogeneity that is also known to affect population stability<sup>16</sup> would improve our understanding of the determinant of community stability.”

**We also ask that you take special care to ensure that statements throughout the manuscript do not inflate the strength of the results, and that the terminology with respect to population and community stability is not misleading, e.g. the statement in L157-159 of the manuscript with tracked changes suggests that population stability of single species was measured separately from the community data rather than partitioned from the latter using the approach from reference 22. (Please note that the Methods section does not contribute to the word limit, and therefore could and should be expanded as needed to ensure that readers can follow it.).**

We thank you for raising this issue. We carefully checked the terminology with respect to population and community stability, adding “weighted mean” to “population stability” to make clear that we talk about the component of the community stability used in the statistical analyses. This change was performed lines 12, 78, 114, 123, 125.

As explained above, we added a full paragraph about the limitation of our study and further made some change to not overstate our results, for example lines 100 and 145-146.

**Finally, we ask that you clarify why the data and codes are only available upon request and were not shared for the review process. At a minimum, we ask that you provide the raw data underlying the key figures, please see the "Data Deposition" and "Source Data" paragraphs below.**

We modified the data and codes availability in the manuscript, and we uploaded our data and codes in a Zenodo repository [<https://doi.org/10.5281/zenodo.3678366>].

In addition to these changes, during the revision process, we noticed several typos that we corrected as well as some unclear parts that we tried to clarify. This includes typos in the values presented in fig.3; some

clarifications of the axis labels in the supplementary figures and in the legends of the figures; a clearer explanation of the effects of landscape composition on population stability.

### **Reviewer #3**

**I maintain that I think that the time series is short for analysing community stability over time. Invertebrates such as butterflies are known to fluctuate at least an order of magnitude in population size between years, and this also affects community dynamics. The argument that other studies also have used short time series does not solve this issue.**

See our answer to editor's comment above and the insertion made in the limit section of the manuscript, line 175-184:

“Here we measured community stability at a relatively short-time scale (up to 6, 17 and 11 years for respectively bat, bird and butterfly communities), reflecting the time scale used in most studies on the relationship between diversity and community stability<sup>6</sup>. However, population and community temporal variability are known to increase with the considered time scale<sup>40-42</sup> and as such, our estimates of temporal variability might underestimate the full variability of the studied communities. While this should not affect the effects of landscape composition we found, and indeed our results are robust when compared with analyses on two subsets of our datasets with different time series durations (see Methods and Supplementary Fig. 7-9), longer time series would be required to estimate the full variability of the studied communities.”

**My previous comment that only a part of the habitat was sampled (for butterflies) is also not fully resolved. The authors argue that population declines should be reflected in gardens even if butterflies only forage (and not reproduce) there. But the point is that the extent to which butterflies use gardens for foraging might differ between years, depending on e.g. weather. In a dry year, an irrigated garden might be used to a much higher extent than natural habitats, but this might not be true in another year.**

See our answer to editor's comment above and the insertion made in the limit section of the manuscript, line 184-190:

Another limitation of our study is that we assessed habitat degradation at the landscape scale and did not account for local conditions, such as management practices, that could also affect community variability. For example, butterfly data were collected in private gardens with different management strategies that are known to affect the attractiveness for butterflies<sup>43</sup>. Accounting for such management practices as well as other local scale characteristics such as habitat heterogeneity that is also known to affect population stability<sup>16</sup> would improve our understanding of the determinant of community stability.
